# Supplementary material for: Interactions of coinage metal clusters with histidine and their effects on histidine acidity; theoretical investigation
Source: Royal Society of Chemistry journal article supplement (doi:10.1039/c2ob25711d), 2012-01-01
Supplement: c2ob25711d.pdf [file c2ob25711d.pdf]

## Supporting information

### **“Interactions of Coinage Metal Clusters with Histidine and their Effects on Histidine Acidity; Theoretical Investigation”**

Marjan Jebeli Javan<sup>a</sup>, Zahra Jamshidi<sup>b,\*</sup>, Zahra Aliakbar Tehrani<sup>a</sup> & Alireza Fattahi<sup>a,\*</sup>

<sup>a</sup>*Department of Chemistry, Sharif University of Technology, P.O. Box: 11365-9516, Tehran, Iran.*

*E-mail: fattahi@sharif.edu; Tel: +98-21-66165342*

<sup>b</sup>*Chemistry and Chemical Engineering Research Center of Iran, P.O. Box: 14335-186, Tehran, Iran.*

*E-mail: jamshidi@ccerci.ac.ir; Tel: +98-21-44580720*

## TABLE OF CONTENTS

|                                            |    |
|--------------------------------------------|----|
| Fig S1                                     | 3  |
| Fig S2                                     | 4  |
| Fig S3                                     | 4  |
| Fig S4                                     | 5  |
| Fig S5                                     | 5  |
| Table S1                                   | 6  |
| Table S2                                   | 7  |
| Table S3                                   | 8  |
| Table S4                                   | 9  |
| Table S5                                   | 10 |
| Table S6                                   | 11 |
| Fig S6                                     | 12 |
| List of energies and Cartesian coordinates | 13 |

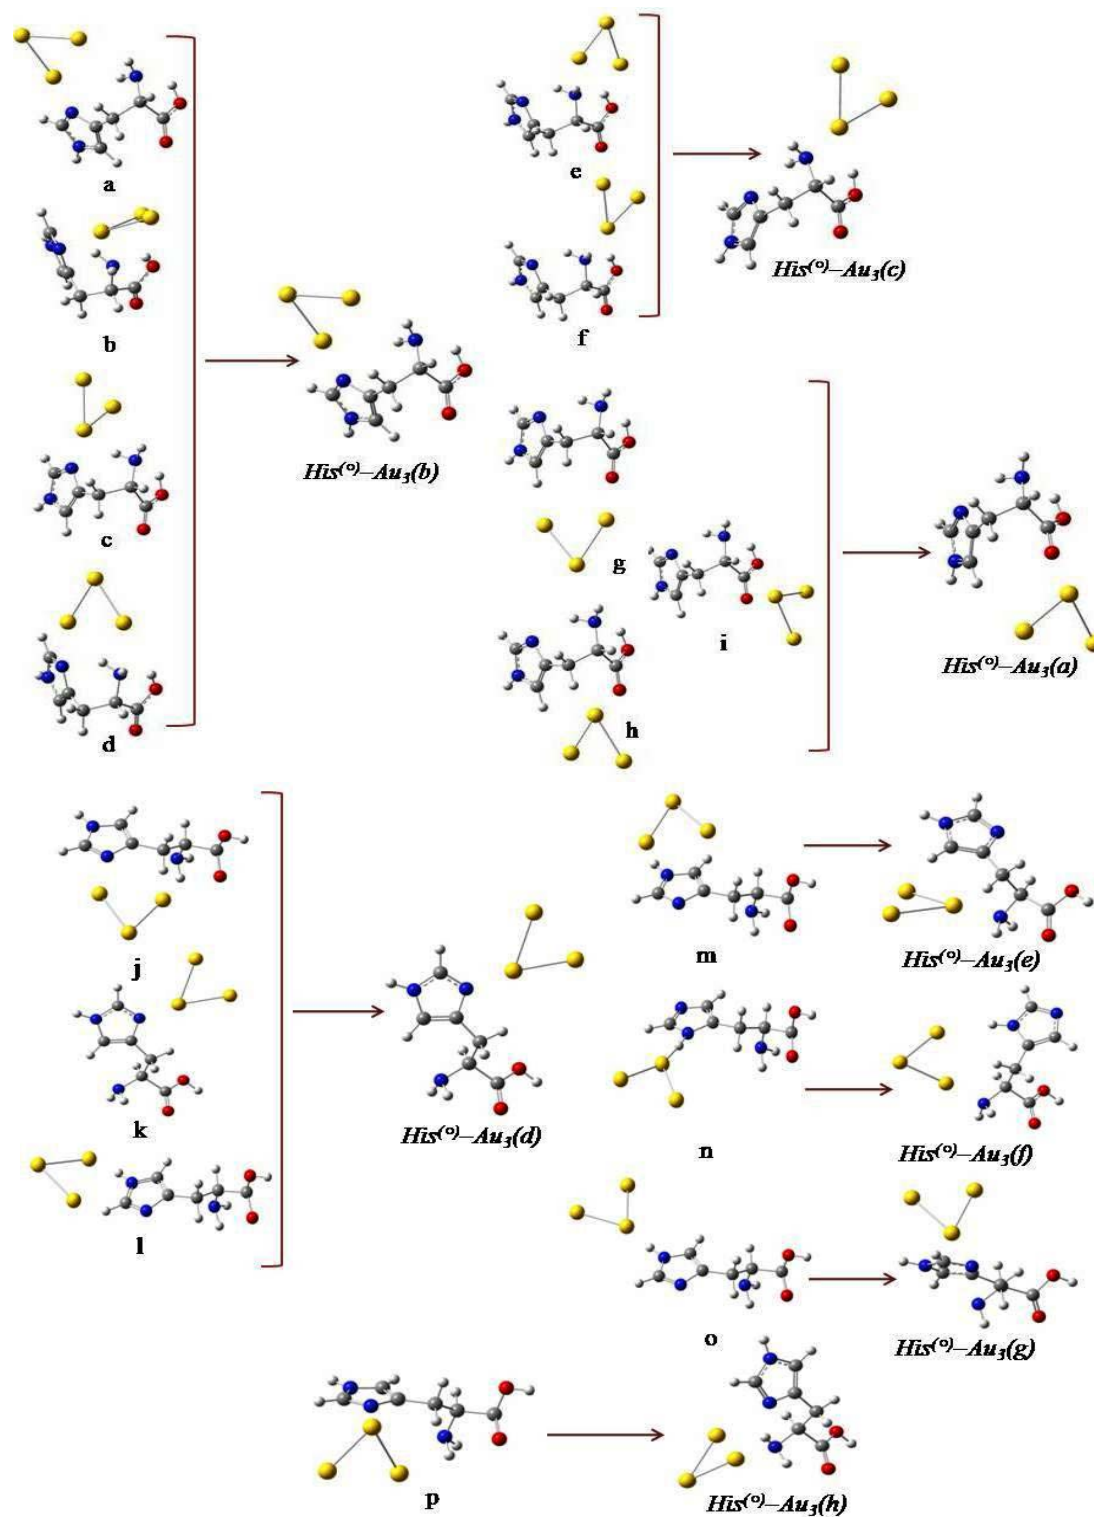

Fig S1. The initial structures (a, b, c, d, e, f, g, h, i, j, k, l, m, n, o and p) for optimization are shown in the left and the optimized structures ( $His^{(0)}-Au_3(a)$ ,  $His^{(0)}-Au_3(b)$ ,  $His^{(0)}-Au_3(c)$ ,  $His^{(0)}-Au_3(d)$ ,  $His^{(0)}-Au_3(e)$ ,  $His^{(0)}-Au_3(f)$ ,  $His^{(0)}-Au_3(g)$  and  $His^{(0)}-Au_3(h)$ ) of  $His^{(0)}-Au_3$  complexes calculated at B3LYP/6-31+G\*\*  $\cup$  LANL2DZ are depicted in the right.

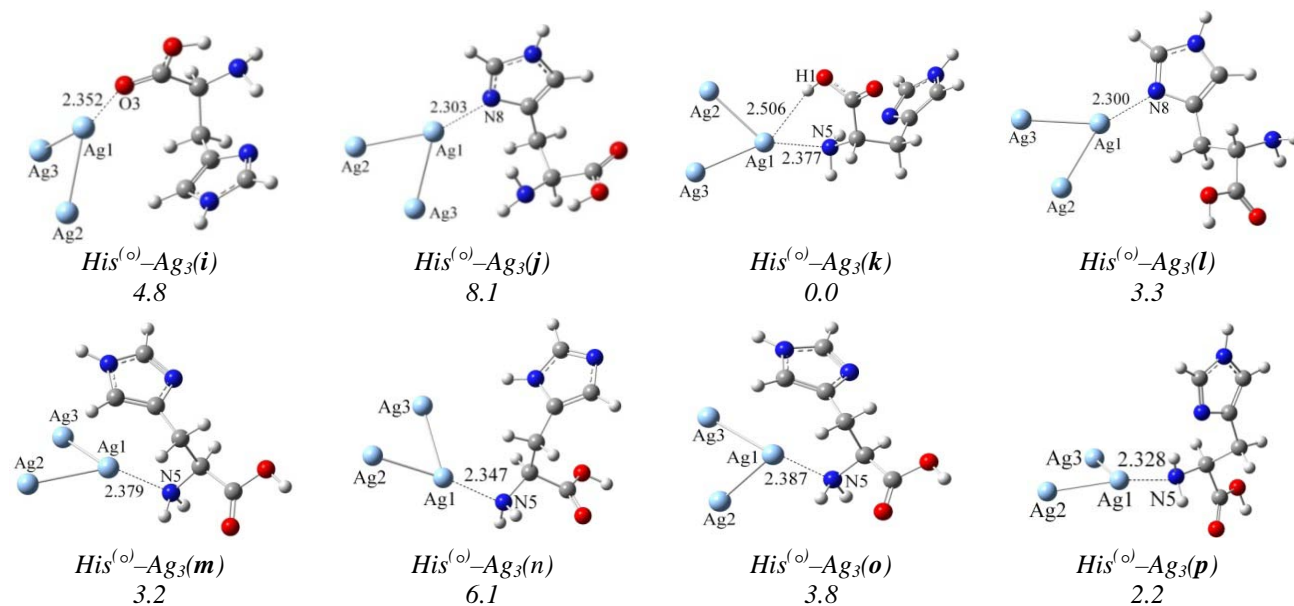

Fig S2. Optimized geometries (B3LYP/6-31+G\*\* U LANL2DZ) of neutral histidine with  $Ag_3$  cluster. Relative potential energies including the ZPE values, in kcal/mol. Distances in Å.

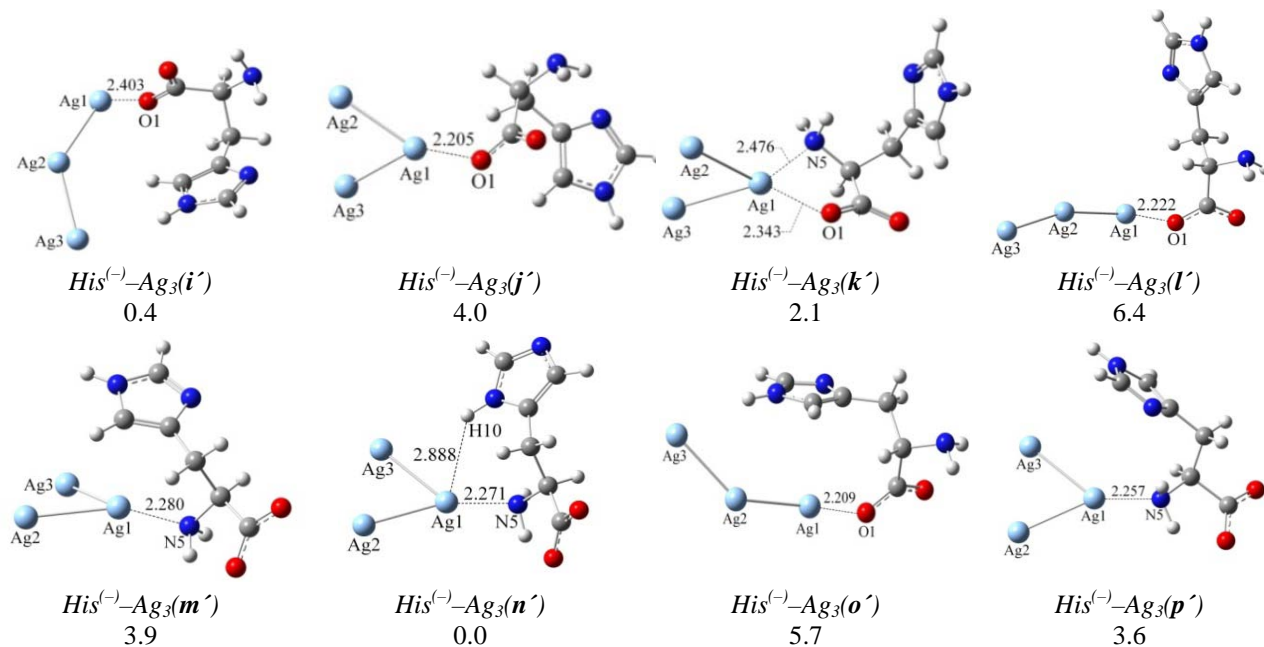

Fig S3. Optimized geometries (B3LYP/6-31+G\*\* U LANL2DZ) of anionic histidine with  $Ag_3$  cluster. Relative potential energies including the ZPE values, in kcal/mol. Distances in Å.

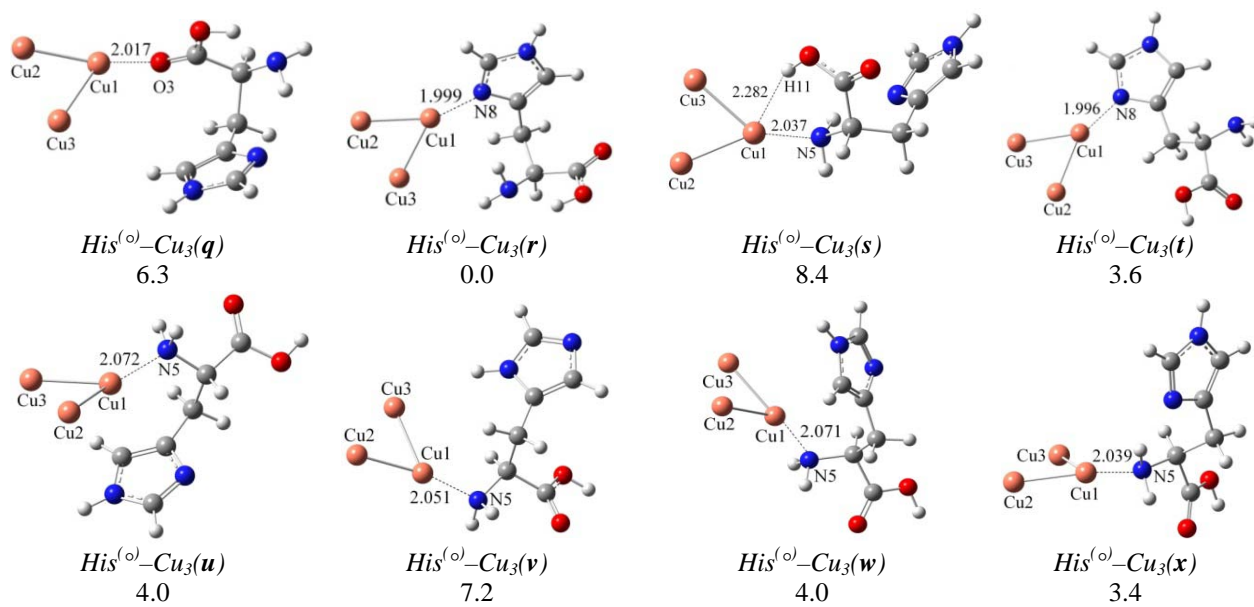

Fig S4. Optimized geometries (B3LYP/6-31+G\*\* U LANL2DZ) of neutral histidine with  $\text{Cu}_3$  cluster. Relative potential energies including the ZPE values, in kcal/mol. Distances in Å.

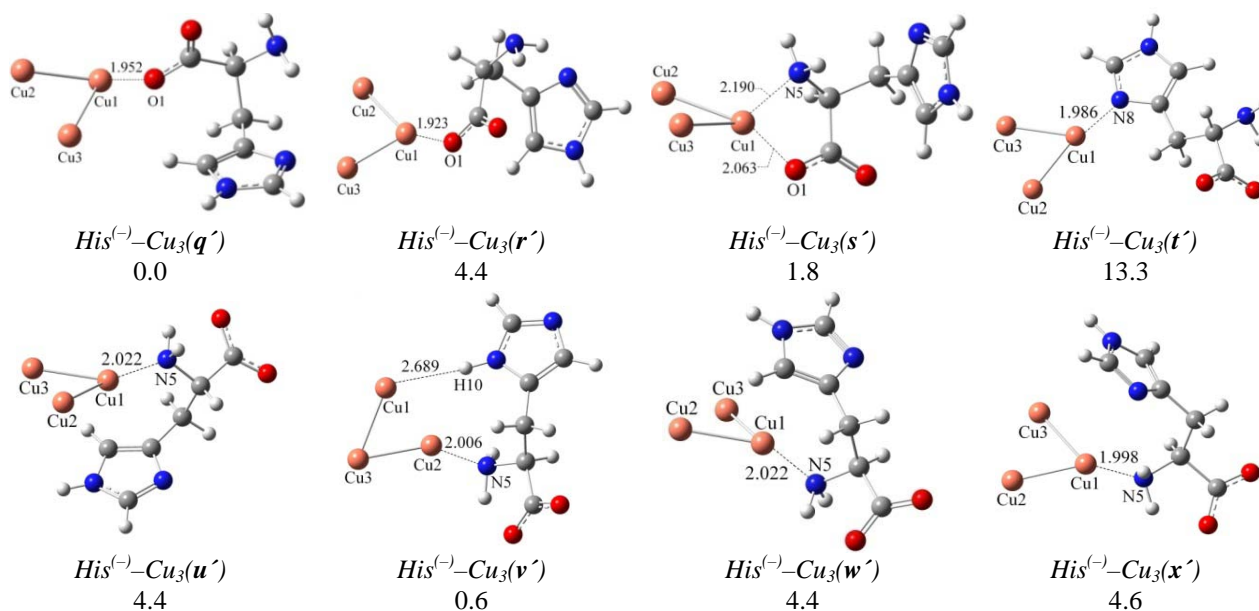

Fig S5. Optimized geometries (B3LYP/6-31+G\*\* U LANL2DZ) of anionic histidine with  $\text{Cu}_3$  cluster. Relative potential energies including the ZPE values, in kcal/mol. Distances in Å.

Table S1. Geometric Features of Anionic and Neutral Histidine with Ag<sub>3</sub> Cluster<sup>a</sup>

| Complex                                                 | Anchor bond                     | $r_{M-X}^a$ | $E_b^b$ | Complex                                                              | Anchor bond                      | $r_{M-X}$ | $E_b$  |
|---------------------------------------------------------|---------------------------------|-------------|---------|----------------------------------------------------------------------|----------------------------------|-----------|--------|
| <i>His</i> <sup>(o)</sup> -Ag <sub>3</sub> ( <i>i</i> ) | Ag <sub>1</sub> -O <sub>3</sub> | 2.352       | -2.45   | <i>His</i> <sup>(-)</sup> -Ag <sub>3</sub> ( <i>i</i> <sup>'</sup> ) | Ag <sub>1</sub> -O <sub>1</sub>  | 2.403     | -25.49 |
| <i>His</i> <sup>(o)</sup> -Ag <sub>3</sub> ( <i>j</i> ) | Ag <sub>1</sub> -N <sub>8</sub> | 2.303       | 1.02    | <i>His</i> <sup>(-)</sup> -Ag <sub>3</sub> ( <i>j</i> <sup>'</sup> ) | Ag <sub>1</sub> -O <sub>1</sub>  | 2.205     | -22.00 |
| <i>His</i> <sup>(o)</sup> -Ag <sub>3</sub> ( <i>k</i> ) | Ag <sub>1</sub> -N <sub>5</sub> | 2.377       | -7.00   | <i>His</i> <sup>(-)</sup> -Ag <sub>3</sub> ( <i>k</i> <sup>'</sup> ) | Ag <sub>1</sub> -O <sub>1</sub>  | 2.343     | -23.78 |
|                                                         | Ag <sub>1</sub> -H <sub>1</sub> | 2.506       |         |                                                                      | Ag <sub>1</sub> -N <sub>5</sub>  | 2.476     |        |
| <i>His</i> <sup>(o)</sup> -Ag <sub>3</sub> ( <i>l</i> ) | Ag <sub>1</sub> -N <sub>8</sub> | 2.300       | -3.85   | <i>His</i> <sup>(-)</sup> -Ag <sub>3</sub> ( <i>l</i> <sup>'</sup> ) | Ag <sub>1</sub> -O <sub>1</sub>  | 2.222     | -19.69 |
| <i>His</i> <sup>(o)</sup> -Ag <sub>3</sub> ( <i>m</i> ) | Ag <sub>1</sub> -N <sub>5</sub> | 2.379       | -3.70   | <i>His</i> <sup>(-)</sup> -Ag <sub>3</sub> ( <i>m</i> <sup>'</sup> ) | Ag <sub>1</sub> -N <sub>5</sub>  | 2.280     | -22.52 |
| <i>His</i> <sup>(o)</sup> -Ag <sub>3</sub> ( <i>n</i> ) | Ag <sub>1</sub> -N <sub>5</sub> | 2.347       | -0.84   | <i>His</i> <sup>(-)</sup> -Ag <sub>3</sub> ( <i>n</i> <sup>'</sup> ) | Ag <sub>1</sub> -H <sub>10</sub> | 2.888     | -25.95 |
|                                                         |                                 |             |         |                                                                      | Ag <sub>1</sub> -N <sub>5</sub>  | 2.271     |        |
| <i>His</i> <sup>(o)</sup> -Ag <sub>3</sub> ( <i>o</i> ) | Ag <sub>1</sub> -N <sub>5</sub> | 2.387       | -3.74   | <i>His</i> <sup>(-)</sup> -Ag <sub>3</sub> ( <i>o</i> <sup>'</sup> ) | Ag <sub>1</sub> -O <sub>1</sub>  | 2.209     | -20.34 |
| <i>His</i> <sup>(o)</sup> -Ag <sub>3</sub> ( <i>p</i> ) | Ag <sub>1</sub> -N <sub>5</sub> | 2.328       | -4.54   | <i>His</i> <sup>(-)</sup> -Ag <sub>3</sub> ( <i>p</i> <sup>'</sup> ) | Ag <sub>1</sub> -N <sub>5</sub>  | 2.257     | -22.09 |

<sup>a</sup> $r_{M-X}$  is the length of the anchoring bond or nonconventional H-bonds, (X = O, N, and H). <sup>b</sup>The binding energy,  $E_b$ , includes zero-point vibrational energy in kcal/mol.

Table S2. Geometric Features of Anionic and Neutral Histidine with Cu<sub>3</sub> Cluster <sup>a</sup>

| Complex                                                 | Anchor bond                      | $r_{M-X}^a$ | $E_b^b$ | Complex                                                  | Anchor bond                      | $r_{M-X}$ | $E_b$  |
|---------------------------------------------------------|----------------------------------|-------------|---------|----------------------------------------------------------|----------------------------------|-----------|--------|
| <i>His</i> <sup>(o)</sup> -Cu <sub>3</sub> ( <b>q</b> ) | Cu <sub>1</sub> -O <sub>3</sub>  | 2.017       | -14.58  | <i>His</i> <sup>(-)</sup> -Cu <sub>3</sub> ( <b>q'</b> ) | Cu <sub>1</sub> -O <sub>1</sub>  | 1.952     | -39.48 |
| <i>His</i> <sup>(o)</sup> -Cu <sub>3</sub> ( <b>r</b> ) | Cu <sub>1</sub> -N <sub>8</sub>  | 1.999       | -20.69  | <i>His</i> <sup>(-)</sup> -Cu <sub>3</sub> ( <b>r'</b> ) | Cu <sub>1</sub> -O <sub>1</sub>  | 1.923     | -35.25 |
| <i>His</i> <sup>(o)</sup> -Cu <sub>3</sub> ( <b>s</b> ) | Cu <sub>1</sub> -N <sub>5</sub>  | 2.037       | -12.51  | <i>His</i> <sup>(-)</sup> -Cu <sub>3</sub> ( <b>s'</b> ) | Cu <sub>1</sub> -N <sub>5</sub>  | 2.190     | -37.62 |
|                                                         | Cu <sub>1</sub> -H <sub>11</sub> | 2.282       |         |                                                          | Cu <sub>1</sub> -O <sub>1</sub>  | 2.063     |        |
| <i>His</i> <sup>(o)</sup> -Cu <sub>3</sub> ( <b>t</b> ) | Cu <sub>1</sub> -N <sub>8</sub>  | 1.996       | -16.28  | <i>His</i> <sup>(-)</sup> -Cu <sub>3</sub> ( <b>t'</b> ) | Cu <sub>1</sub> -N <sub>8</sub>  | 1.986     | -25.44 |
| <i>His</i> <sup>(o)</sup> -Cu <sub>3</sub> ( <b>u</b> ) | Cu <sub>1</sub> -N <sub>5</sub>  | 2.072       | -15.69  | <i>His</i> <sup>(-)</sup> -Cu <sub>3</sub> ( <b>u'</b> ) | Cu <sub>1</sub> -N <sub>5</sub>  | 2.022     | -34.12 |
| <i>His</i> <sup>(o)</sup> -Cu <sub>3</sub> ( <b>v</b> ) | Cu <sub>1</sub> -N <sub>5</sub>  | 2.051       | -12.54  | <i>His</i> <sup>(-)</sup> -Cu <sub>3</sub> ( <b>v'</b> ) | Cu <sub>1</sub> -H <sub>10</sub> | 2.689     | -38.21 |
|                                                         |                                  |             |         |                                                          | Cu <sub>2</sub> -N <sub>5</sub>  | 2.006     |        |
| <i>His</i> <sup>(o)</sup> -Cu <sub>3</sub> ( <b>w</b> ) | Cu <sub>1</sub> -N <sub>5</sub>  | 2.071       | -15.69  | <i>His</i> <sup>(-)</sup> -Cu <sub>3</sub> ( <b>w'</b> ) | Cu <sub>1</sub> -N <sub>5</sub>  | 2.022     | -34.12 |
| <i>His</i> <sup>(o)</sup> -Cu <sub>3</sub> ( <b>x</b> ) | Cu <sub>1</sub> -N <sub>5</sub>  | 2.039       | -16.11  | <i>His</i> <sup>(-)</sup> -Cu <sub>3</sub> ( <b>x'</b> ) | Cu <sub>1</sub> -N <sub>5</sub>  | 1.998     | -33.88 |

<sup>a</sup> $r_{M-X}$  is the length of the anchoring bond or nonconventional H-bonds, (X = O, N, and H). <sup>b</sup> The binding energy,  $E_b$ , includes zero-point vibrational energy in kcal/mol.

Table S3. Geometric Features of Neutral Histidine with M<sub>3</sub> Clusters (M = Au, Ag and Cu) <sup>a</sup>

| Complex                                        | Anchor bond                      | $\nu_{M-X}$ | $\Delta\nu_{A-X}$                          | $\Delta r_{A-X}$                         | $-\Delta H_f$ |
|------------------------------------------------|----------------------------------|-------------|--------------------------------------------|------------------------------------------|---------------|
| <i>His</i> <sup>(o)</sup> -Au <sub>3</sub> (a) | Au <sub>1</sub> -O <sub>3</sub>  | 177.73      | C <sub>2</sub> -O <sub>3</sub> (146.96)    | C <sub>2</sub> -O <sub>3</sub> (0.020)   | -10.05        |
| <i>His</i> <sup>(o)</sup> -Au <sub>3</sub> (b) | Au <sub>1</sub> -N <sub>8</sub>  | 199.81      | N <sub>8</sub> -C <sub>9</sub> (4.44)      | N <sub>8</sub> -C <sub>9</sub> (0.009)   | -18.48        |
|                                                | Au <sub>1</sub> -H <sub>5</sub>  | 59.83       | N <sub>5</sub> -H <sub>5</sub> (-84.16)    | N <sub>5</sub> -H <sub>5</sub> (0.010)   |               |
| <i>His</i> <sup>(o)</sup> -Au <sub>3</sub> (c) | Au <sub>1</sub> -H <sub>1</sub>  | 104.31      | O <sub>1</sub> -H <sub>1</sub> (-159.62)   | O <sub>3</sub> -H <sub>3</sub> (0.009)   | -9.93         |
|                                                | Au <sub>1</sub> -N <sub>5</sub>  | 165.27      | C <sub>4</sub> -N <sub>5</sub> (-123.62)   | C <sub>4</sub> -N <sub>5</sub> (0.019)   |               |
| <i>His</i> <sup>(o)</sup> -Au <sub>3</sub> (d) | Au <sub>1</sub> -N <sub>8</sub>  | 209.55      | N <sub>8</sub> -C <sub>9</sub> (4.86)      | N <sub>8</sub> -C <sub>9</sub> (0.007)   | -14.90        |
| <i>His</i> <sup>(o)</sup> -Au <sub>3</sub> (e) | Au <sub>1</sub> -N <sub>5</sub>  | 158.14      | C <sub>4</sub> -N <sub>5</sub> (-30.22)    | C <sub>4</sub> -N <sub>5</sub> (0.008)   | -13.00        |
| <i>His</i> <sup>(o)</sup> -Au <sub>3</sub> (f) | Au <sub>1</sub> -H <sub>10</sub> | 81.61       | N <sub>10</sub> -H <sub>10</sub> (-173.65) | N <sub>10</sub> -H <sub>10</sub> (0.740) | -11.30        |
|                                                | Au <sub>2</sub> -N <sub>5</sub>  | 169.02      | C <sub>4</sub> -N <sub>5</sub> (-34.53)    | C <sub>4</sub> -N <sub>5</sub> (0.012)   |               |
| <i>His</i> <sup>(o)</sup> -Au <sub>3</sub> (g) | Au <sub>1</sub> -C <sub>11</sub> | 135.58      | C <sub>7</sub> -C <sub>11</sub> (-103.51)  | C <sub>7</sub> -C <sub>11</sub> (0.043)  | -4.90         |
| <i>His</i> <sup>(o)</sup> -Au <sub>3</sub> (h) | Cu <sub>1</sub> -N <sub>5</sub>  | 146.12      | C <sub>4</sub> -N <sub>5</sub> (-23.08)    | C <sub>4</sub> -N <sub>5</sub> (0.009)   | -15.40        |
|                                                |                                  |             |                                            |                                          |               |
| <i>His</i> <sup>(o)</sup> -Ag <sub>3</sub> (i) | Ag <sub>1</sub> -O <sub>3</sub>  | 181.40      | C <sub>2</sub> -O <sub>3</sub> (-49.81)    | C <sub>2</sub> -O <sub>3</sub> (0.012)   | -1.56         |
| <i>His</i> <sup>(o)</sup> -Ag <sub>3</sub> (j) | Ag <sub>1</sub> -N <sub>8</sub>  | 187.90      | N <sub>8</sub> -C <sub>9</sub> (2.05)      | N <sub>8</sub> -C <sub>9</sub> (0.006)   | 1.91          |
| <i>His</i> <sup>(o)</sup> -Ag <sub>3</sub> (k) | Ag <sub>1</sub> -N <sub>5</sub>  | 167.56      | C <sub>4</sub> -N <sub>5</sub> (-29.70)    | C <sub>4</sub> -N <sub>5</sub> (0.010)   | -6.12         |
| <i>His</i> <sup>(o)</sup> -Ag <sub>3</sub> (l) | Ag <sub>1</sub> -N <sub>8</sub>  | 181.67      | N <sub>8</sub> -C <sub>9</sub> (2.01)      | N <sub>8</sub> -C <sub>9</sub> (0.004)   | -2.97         |
| <i>His</i> <sup>(o)</sup> -Ag <sub>3</sub> (m) | Ag <sub>1</sub> -N <sub>5</sub>  | 167.09      | C <sub>4</sub> -N <sub>5</sub> (-45.59)    | C <sub>4</sub> -N <sub>5</sub> (-0.002)  | -2.81         |
| <i>His</i> <sup>(o)</sup> -Ag <sub>3</sub> (o) | Ag <sub>1</sub> -N <sub>5</sub>  | 163.99      | C <sub>4</sub> -N <sub>5</sub> (-47.45)    | C <sub>4</sub> -N <sub>5</sub> (-0.002)  | 0.05          |
| <i>His</i> <sup>(o)</sup> -Ag <sub>3</sub> (n) | Ag <sub>1</sub> -N <sub>5</sub>  | 177.55      | C <sub>4</sub> -N <sub>5</sub> (-45.95)    | C <sub>4</sub> -N <sub>5</sub> (0.005)   | -2.86         |
| <i>His</i> <sup>(o)</sup> -Ag <sub>3</sub> (p) | Ag <sub>1</sub> -N <sub>5</sub>  | 177.55      | C <sub>4</sub> -N <sub>5</sub> (-18.06)    | C <sub>4</sub> -N <sub>5</sub> (0.001)   | -3.65         |
|                                                |                                  |             |                                            |                                          |               |
| <i>His</i> <sup>(o)</sup> -Cu <sub>3</sub> (q) | Cu <sub>1</sub> -O <sub>3</sub>  | 166.07      | C <sub>2</sub> -O <sub>3</sub> (-63.27)    | C <sub>2</sub> -O <sub>3</sub> (0.018)   | -13.69        |
| <i>His</i> <sup>(o)</sup> -Cu <sub>3</sub> (r) | Cu <sub>1</sub> -N <sub>8</sub>  | 170.16      | N <sub>8</sub> -C <sub>9</sub> (4.17)      | N <sub>8</sub> -C <sub>9</sub> (-0.008)  | -19.80        |
| <i>His</i> <sup>(o)</sup> -Cu <sub>3</sub> (s) | Cu <sub>1</sub> -N <sub>5</sub>  | 159.81      | C <sub>4</sub> -N <sub>5</sub> (-27.65)    | C <sub>4</sub> -N <sub>5</sub> (0.014)   | -11.63        |
|                                                | Cu <sub>2</sub> -H <sub>1</sub>  | 107.49      | O <sub>1</sub> -H <sub>1</sub> (92.00)     | O <sub>1</sub> -H <sub>1</sub> (-0.009)  |               |
| <i>His</i> <sup>(o)</sup> -Cu <sub>3</sub> (t) | Cu <sub>1</sub> -N <sub>8</sub>  | 169.94      | N <sub>8</sub> -C <sub>9</sub> (4.37)      | N <sub>8</sub> -C <sub>9</sub> (0.007)   | -16.28        |
| <i>His</i> <sup>(o)</sup> -Cu <sub>3</sub> (u) | Cu <sub>1</sub> -N <sub>5</sub>  | 144.59      | C <sub>4</sub> -N <sub>5</sub> (-32.71)    | C <sub>4</sub> -N <sub>5</sub> (0.001)   | -15.69        |
| <i>His</i> <sup>(o)</sup> -Cu <sub>3</sub> (v) | Cu <sub>1</sub> -N <sub>5</sub>  | 147.36      | C <sub>4</sub> -N <sub>5</sub> (-35.96)    | C <sub>4</sub> -N <sub>5</sub> (0.009)   | -12.54        |
| <i>His</i> <sup>(o)</sup> -Cu <sub>3</sub> (w) | Cu <sub>1</sub> -N <sub>5</sub>  | 144.83      | C <sub>4</sub> -N <sub>5</sub> (-32.73)    | C <sub>4</sub> -N <sub>5</sub> (0.001)   | -15.69        |
| <i>His</i> <sup>(o)</sup> -Cu <sub>3</sub> (x) | Cu <sub>1</sub> -N <sub>5</sub>  | 129.06      | C <sub>4</sub> -N <sub>5</sub> (-19.22)    | C <sub>4</sub> -N <sub>5</sub> (0.006)   | -16.11        |

<sup>a</sup> $\Delta r(A-X)$  is the difference, in angstroms, between the bond lengths of N-C, O-C, N-H, and O-H in the complexed and isolated fragments.  $\Delta\nu(A-X)$ , in cm<sup>-1</sup>, is the difference between the frequency of N-C, O-C, N-H, and O-H bonds in the complexed and isolated fragments. <sup>b</sup>The  $\Delta H_f$  includes thermal Enthalpies in kcal/mol. The notations “(o)” and “(-)” indicate neutral and anionic histidine, respectively.



Table S4. Geometric Features of Anionic Histidine with M<sub>3</sub> Clusters (M = Au, Ag and Cu)<sup>a</sup>

| Complex                                                  | Anchor bond                      | $\nu_{M-X}$ | $\Delta\nu_{A-X}$                          | $\Delta r_{A-X}$                         | $-\Delta H_f$ |
|----------------------------------------------------------|----------------------------------|-------------|--------------------------------------------|------------------------------------------|---------------|
| <i>His</i> <sup>(-)</sup> -Au <sub>3</sub> ( <b>a'</b> ) | Au <sub>1</sub> -O <sub>1</sub>  | 169.61      | C <sub>2</sub> -O <sub>1</sub> (34.69)     | C <sub>2</sub> -O <sub>1</sub> (0.039)   | -38.38        |
| <i>His</i> <sup>(-)</sup> -Au <sub>3</sub> ( <b>b'</b> ) | Au <sub>1</sub> -O <sub>1</sub>  | 136.06      | C <sub>2</sub> -O <sub>1</sub> (19.69)     | C <sub>2</sub> -O <sub>1</sub> (0.042)   | -33.36        |
| <i>His</i> <sup>(-)</sup> -Au <sub>3</sub> ( <b>c'</b> ) | Au <sub>1</sub> -O <sub>1</sub>  | 140.61      | C <sub>2</sub> -O <sub>1</sub> (14.20)     | C <sub>2</sub> -O <sub>1</sub> (0.010)   | -31.94        |
| <i>His</i> <sup>(-)</sup> -Au <sub>3</sub> ( <b>d'</b> ) | Au <sub>1</sub> -N <sub>5</sub>  | 172.51      | C <sub>4</sub> -N <sub>5</sub> (47.95)     | C <sub>4</sub> -N <sub>5</sub> (-0.007)  | -26.58        |
| <i>His</i> <sup>(-)</sup> -Au <sub>3</sub> ( <b>e'</b> ) | Au <sub>1</sub> -N <sub>8</sub>  | 215.32      | N <sub>8</sub> -C <sub>9</sub> (83.69)     | N <sub>8</sub> -C <sub>9</sub> (0.004)   | -26.58        |
| <i>His</i> <sup>(-)</sup> -Au <sub>3</sub> ( <b>e'</b> ) | Au <sub>1</sub> -N <sub>5</sub>  | 218.86      | C <sub>4</sub> -N <sub>5</sub> (46.96)     | C <sub>4</sub> -N <sub>5</sub> (0.017)   | -36.41        |
| <i>His</i> <sup>(-)</sup> -Au <sub>3</sub> ( <b>f'</b> ) | Au <sub>1</sub> -H <sub>10</sub> | 62.21       | N <sub>10</sub> -H <sub>10</sub> (-148.38) | N <sub>10</sub> -H <sub>10</sub> (0.009) | -42.00        |
| <i>His</i> <sup>(-)</sup> -Au <sub>3</sub> ( <b>f'</b> ) | Au <sub>2</sub> -N <sub>5</sub>  | 144.74      | C <sub>4</sub> -N <sub>5</sub> (77.28)     | C <sub>4</sub> -N <sub>5</sub> (0.018)   | -42.00        |
| <i>His</i> <sup>(-)</sup> -Au <sub>3</sub> ( <b>g'</b> ) | Au <sub>1</sub> -C <sub>11</sub> | 137.16      | C <sub>7</sub> -C <sub>11</sub> (-103.66)  | C <sub>7</sub> -C <sub>11</sub> (0.048)  | -16.87        |
| <i>His</i> <sup>(-)</sup> -Au <sub>3</sub> ( <b>h'</b> ) | Au <sub>1</sub> -N <sub>5</sub>  | 146.12      | C <sub>4</sub> -N <sub>5</sub> (57.74)     | C <sub>4</sub> -N <sub>5</sub> (0.017)   | -37.35        |
| <i>His</i> <sup>(-)</sup> -Ag <sub>3</sub> ( <b>i'</b> ) | Ag <sub>1</sub> -O <sub>1</sub>  | 143.83      | C <sub>2</sub> -O <sub>1</sub> (-55.90)    | C <sub>2</sub> -O <sub>1</sub> (0.009)   | -24.60        |
| <i>His</i> <sup>(-)</sup> -Ag <sub>3</sub> ( <b>j'</b> ) | Ag <sub>1</sub> -O <sub>1</sub>  | 144.12      | C <sub>2</sub> -O <sub>1</sub> (4.76)      | C <sub>2</sub> -O <sub>1</sub> (0.030)   | -21.11        |
| <i>His</i> <sup>(-)</sup> -Ag <sub>3</sub> ( <b>k'</b> ) | Ag <sub>1</sub> -O <sub>1</sub>  | 179.19      | C <sub>2</sub> -O <sub>1</sub> (15.70)     | C <sub>2</sub> -O <sub>1</sub> (0.009)   | -22.89        |
| <i>His</i> <sup>(-)</sup> -Ag <sub>3</sub> ( <b>k'</b> ) | Ag <sub>1</sub> -N <sub>5</sub>  | 141.58      | C <sub>4</sub> -N <sub>5</sub> (52.79)     | C <sub>4</sub> -N <sub>5</sub> (-0.007)  | -18.80        |
| <i>His</i> <sup>(-)</sup> -Ag <sub>3</sub> ( <b>l'</b> ) | Ag <sub>1</sub> -O <sub>1</sub>  | 152.58      | C <sub>2</sub> -O <sub>1</sub> (5.27)      | C <sub>2</sub> -O <sub>1</sub> (0.024)   | -18.80        |
| <i>His</i> <sup>(-)</sup> -Ag <sub>3</sub> ( <b>m'</b> ) | Ag <sub>1</sub> -N <sub>5</sub>  | 174.44      | C <sub>4</sub> -N <sub>5</sub> (43.83)     | C <sub>4</sub> -N <sub>5</sub> (0.001)   | -21.63        |
| <i>His</i> <sup>(-)</sup> -Ag <sub>3</sub> ( <b>n'</b> ) | Ag <sub>1</sub> -H <sub>10</sub> | 92.63       | N <sub>10</sub> -H <sub>10</sub> (-151.62) | N <sub>10</sub> -H <sub>10</sub> (0.008) | -25.06        |
| <i>His</i> <sup>(-)</sup> -Ag <sub>3</sub> ( <b>n'</b> ) | Ag <sub>1</sub> -N <sub>5</sub>  | 150.21      | C <sub>4</sub> -N <sub>5</sub> (74.43)     | C <sub>4</sub> -N <sub>5</sub> (0.007)   | -25.06        |
| <i>His</i> <sup>(-)</sup> -Ag <sub>3</sub> ( <b>o'</b> ) | Ag <sub>1</sub> -O <sub>1</sub>  | 147.71      | C <sub>2</sub> -O <sub>1</sub> (5.25)      | C <sub>2</sub> -O <sub>1</sub> (0.026)   | -19.45        |
| <i>His</i> <sup>(-)</sup> -Ag <sub>3</sub> ( <b>p'</b> ) | Ag <sub>1</sub> -N <sub>5</sub>  | 150.42      | C <sub>4</sub> -N <sub>5</sub> (76.36)     | C <sub>4</sub> -N <sub>5</sub> (0.011)   | -21.20        |
| <i>His</i> <sup>(-)</sup> -Cu <sub>3</sub> ( <b>q'</b> ) | Cu <sub>1</sub> -O <sub>1</sub>  | 138.56      | Cu <sub>1</sub> -O <sub>1</sub> (8.01)     | Cu <sub>1</sub> -O <sub>1</sub> (0.031)  | -38.59        |
| <i>His</i> <sup>(-)</sup> -Cu <sub>3</sub> ( <b>r'</b> ) | Cu <sub>1</sub> -O <sub>1</sub>  | 130.85      | Cu <sub>1</sub> -O <sub>1</sub> (11.55)    | Cu <sub>1</sub> -O <sub>1</sub> (0.033)  | -34.36        |
| <i>His</i> <sup>(-)</sup> -Cu <sub>3</sub> ( <b>s'</b> ) | Cu <sub>1</sub> -N <sub>5</sub>  | 165.52      | C <sub>4</sub> -N <sub>5</sub> (64.97)     | C <sub>4</sub> -N <sub>5</sub> (-0.006)  | -36.74        |
| <i>His</i> <sup>(-)</sup> -Cu <sub>3</sub> ( <b>s'</b> ) | Cu <sub>1</sub> -O <sub>1</sub>  | 181.69      | C <sub>2</sub> -O <sub>1</sub> (23.17)     | C <sub>2</sub> -O <sub>1</sub> (0.013)   | -36.74        |
| <i>His</i> <sup>(-)</sup> -Cu <sub>3</sub> ( <b>t'</b> ) | Cu <sub>1</sub> -N <sub>8</sub>  | 178.95      | N <sub>8</sub> -C <sub>9</sub> (331.41)    | N <sub>8</sub> -C <sub>9</sub> (0.010)   | -25.44        |
| <i>His</i> <sup>(-)</sup> -Cu <sub>3</sub> ( <b>u'</b> ) | Cu <sub>1</sub> -N <sub>5</sub>  | 198.62      | C <sub>4</sub> -N <sub>5</sub> (44.61)     | C <sub>4</sub> -N <sub>5</sub> (0.012)   | -34.12        |
| <i>His</i> <sup>(-)</sup> -Cu <sub>3</sub> ( <b>v'</b> ) | Cu <sub>1</sub> -H <sub>10</sub> | 102.75      | N <sub>10</sub> -H <sub>10</sub> (-233.37) | N <sub>10</sub> -H <sub>10</sub> (0.012) | -38.21        |
| <i>His</i> <sup>(-)</sup> -Cu <sub>3</sub> ( <b>v'</b> ) | Cu <sub>2</sub> -N <sub>5</sub>  | 203.22      | C <sub>4</sub> -N <sub>5</sub> (77.01)     | C <sub>4</sub> -N <sub>5</sub> (0.014)   | -38.21        |
| <i>His</i> <sup>(-)</sup> -Cu <sub>3</sub> ( <b>w'</b> ) | Cu <sub>1</sub> -N <sub>5</sub>  | 198.64      | C <sub>4</sub> -N <sub>5</sub> (44.47)     | C <sub>4</sub> -N <sub>5</sub> (0.011)   | -34.12        |
| <i>His</i> <sup>(-)</sup> -Cu <sub>3</sub> ( <b>x'</b> ) | Cu <sub>1</sub> -N <sub>5</sub>  | 129.06      | C <sub>4</sub> -N <sub>5</sub> (-19.22)    | C <sub>4</sub> -N <sub>5</sub> (0.006)   | -33.88        |

<sup>a</sup> $\Delta r(A-X)$  is the difference, in angstroms, between the bond lengths of N-C, O-C, N-H, and O-H in the complexed and isolated fragments.  $\Delta\nu(A-X)$ , in cm<sup>-1</sup>, is the difference between the frequency of N-C, O-C, N-H, and O-H bonds in the complexed and isolated fragments. <sup>b</sup>The  $\Delta H_f$  includes thermal Enthalpies in kcal/mol. The notations “(•)” and “(-)” indicate neutral and anionic histidine, respectively.

Table S5. The values of total energy (in a.u.), Gibbs free energy (a.u.), and entropy (cal mol<sup>-1</sup> K<sup>-1</sup>) are given at 298 K for His, His-OMe, His-M<sub>3</sub>, His-OMe-M<sub>3</sub>, and their anion.

| Name                                                                 | E            | G            | S       | Name                                           | E            | G            | S       |
|----------------------------------------------------------------------|--------------|--------------|---------|------------------------------------------------|--------------|--------------|---------|
| <i>His</i> <sup>(o)</sup>                                            | -548.8175657 | -548.692697  | 99.595  | <i>His</i> <sup>(o)</sup> -OMe                 | -588.1014817 | -587.952364  | 109.667 |
| <i>His</i> <sup>(-)</sup>                                            | -548.2621749 | -548.151745  | 100.160 | <i>His</i> <sup>(-)</sup> -OMe                 | -587.5489193 | -587.411643  | 105.683 |
| <i>His</i> <sup>(o)</sup> -Au <sub>3</sub> ( <b>b</b> )              | -955.2723904 | -955.162658  | 150.789 | <i>His</i> <sup>(o)</sup> -OMe-Au <sub>3</sub> | -994.5249524 | -994.3932160 | 158.178 |
| <i>His</i> <sup>(-)</sup> -Au <sub>3</sub> ( <b>f</b> <sup>′</sup> ) | -954.7538392 | -954.654945  | 142.425 | <i>His</i> <sup>(-)</sup> -OMe-Au <sub>3</sub> | -994.0556734 | -993.9369600 | 165.218 |
| <i>His</i> <sup>(o)</sup> -Ag <sub>3</sub> ( <b>k</b> )              | -986.1895962 | -986.079899  | 150.377 | <i>His</i> <sup>(o)</sup> -OMe-Ag <sub>3</sub> | -1025.466183 | -1025.339076 | 172.403 |
| <i>His</i> <sup>(-)</sup> -Ag <sub>3</sub> ( <b>n</b> <sup>′</sup> ) | -985.6647644 | -985.570033  | 152.841 | <i>His</i> <sup>(-)</sup> -OMe-Ag <sub>3</sub> | -1024.964246 | -1024.844339 | 162.127 |
| <i>His</i> <sup>(o)</sup> -Cu <sub>3</sub> ( <b>h</b> )              | -1137.315130 | -1137.202109 | 143.771 | <i>His</i> <sup>(o)</sup> -OMe-Cu <sub>3</sub> | -1176.570174 | -1176.440283 | 168.472 |
| <i>His</i> <sup>(-)</sup> -Cu <sub>3</sub> ( <b>g</b> <sup>′</sup> ) | -1136.790228 | -1136.691687 | 145.573 | <i>His</i> <sup>(-)</sup> -OMe-Cu <sub>3</sub> | -1176.088611 | -1175.965764 | 156.350 |

Table S6. Bond critical point data (in a.u.) from quantum theory of atoms in molecules.

| Name                                        | BCP                              | $\rho(r)$ | $\nabla^2 \rho(r)$ | H(r)   |
|---------------------------------------------|----------------------------------|-----------|--------------------|--------|
| <i>His<sup>(-)</sup>-Au<sub>3</sub>(f')</i> | Au <sub>1</sub> -N <sub>5</sub>  | 0.099     | 0.296              | -0.030 |
| <i>His<sup>(-)</sup>-OMe-Au<sub>3</sub></i> | Au <sub>1</sub> -N <sub>10</sub> | 0.113     | 0.334              | -0.039 |
| <i>His<sup>(-)</sup>-Ag<sub>3</sub>(n')</i> | Ag <sub>1</sub> -N <sub>5</sub>  | 0.065     | 0.251              | -0.009 |
| <i>His<sup>(-)</sup>-OMe-Ag<sub>3</sub></i> | Ag <sub>1</sub> -N <sub>10</sub> | 0.074     | 0.302              | -0.011 |
| <i>His<sup>(-)</sup>-Cu<sub>3</sub>(q')</i> | Cu <sub>1</sub> -O <sub>1</sub>  | 0.085     | 0.454              | -0.018 |
| <i>His<sup>(-)</sup>-OMe-Cu<sub>3</sub></i> | Cu <sub>1</sub> -N <sub>10</sub> | 0.097     | 0.398              | -0.032 |

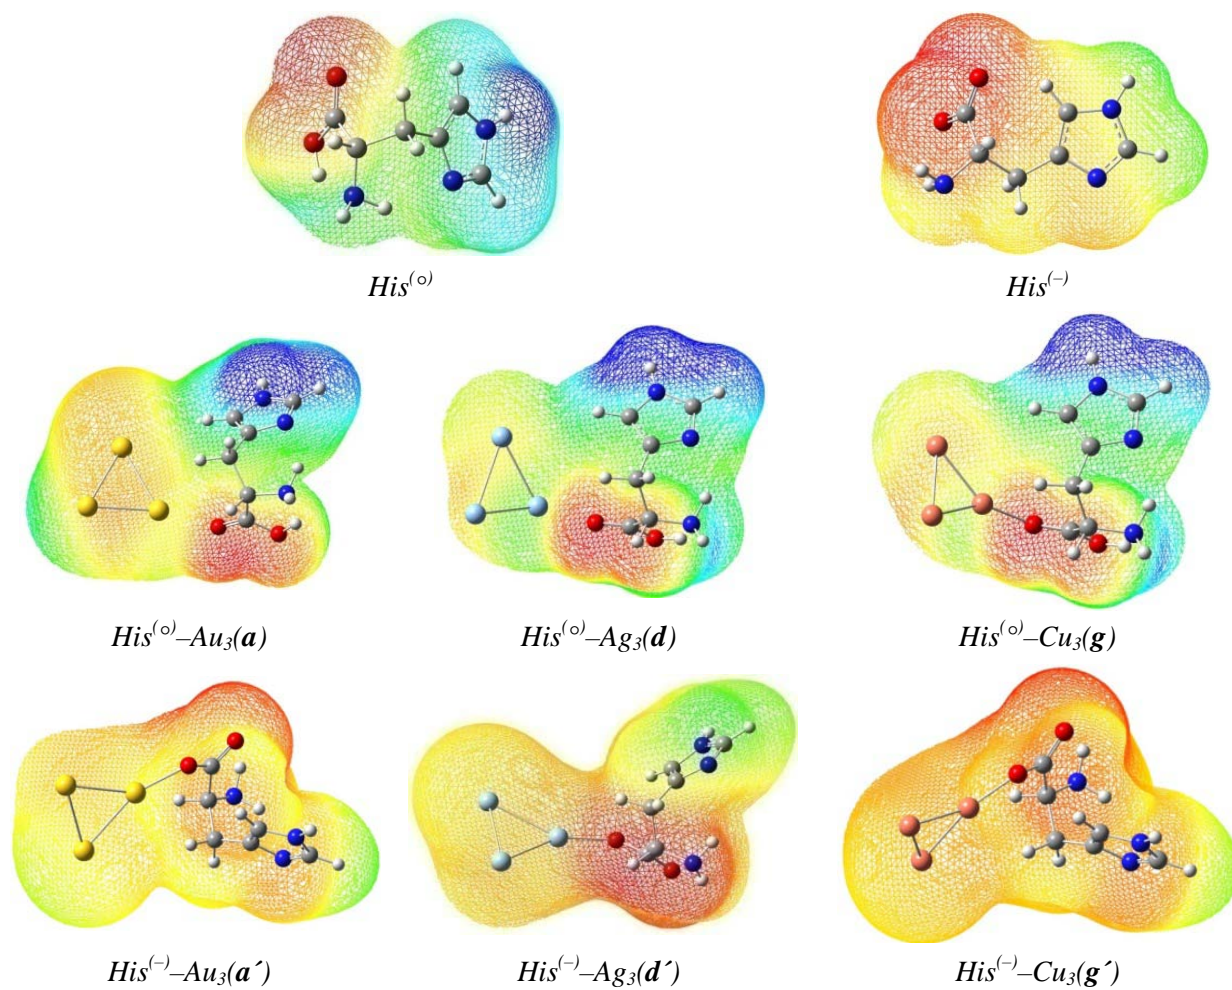

Fig S6. Illustration of electron density plots (ESP) <sup>a</sup> for histidine and the complexes in both neutral and anionic forms.

<sup>a</sup>In ESP plots, the intensity of electron density can be classified in the order of red > yellow > green > blue. The red color shows the highest electron density and blue color shows the lowest one.

## List of energies and Cartesian coordinates

$His^{(\circ)}-Au_3(\mathbf{a})$

$E_{\text{total}} = -955.2560639$  a.u.

Electronic and zero-point Energy = -955.093010

Thermal Energies = -955.076171

Enthalpy = -955.075227

Free Energy = -955.148444

0 2

|    |             |             |             |
|----|-------------|-------------|-------------|
| N  | -5.08629700 | -1.63363400 | 0.95709800  |
| C  | -4.30329900 | -1.66014900 | -0.28950800 |
| C  | -2.81957900 | -1.77800000 | 0.10649300  |
| O  | -1.91694800 | -1.71267500 | -0.73104500 |
| H  | -5.89131400 | -2.24910800 | 0.92402200  |
| H  | -5.39733900 | -0.68215800 | 1.16757800  |
| H  | -4.54592600 | -2.56672000 | -0.85663800 |
| C  | -4.50509100 | -0.42551000 | -1.20613200 |
| C  | -4.11808600 | 0.85113600  | -0.52192700 |
| H  | -5.55954100 | -0.39687000 | -1.50338800 |
| H  | -3.90479700 | -0.56246900 | -2.10916400 |
| C  | -3.00535600 | 1.63450600  | -0.72536000 |
| N  | -4.86005400 | 1.35117700  | 0.53735400  |
| H  | -2.17550900 | 1.55744600  | -1.41088200 |
| H  | -2.37893200 | 3.34255900  | 0.37721500  |
| C  | -4.20586300 | 2.41719400  | 0.96033200  |
| N  | -3.08053200 | 2.63152900  | 0.22205500  |
| H  | -4.50180300 | 3.05886100  | 1.77818000  |
| O  | -2.60217300 | -1.93664100 | 1.39081000  |
| H  | -3.52701300 | -1.93470400 | 1.78497200  |
| Au | 2.72527500  | -0.53843600 | 0.21710100  |
| Au | 0.92095000  | 1.67513100  | -0.06659200 |
| Au | 0.18880000  | -1.04873100 | -0.24404000 |

$His^{(o)}-Au_3(b)$

$E_{total} = -955.2584434$  a.u.

Electronic and zero-point Energy = -955.094837

Thermal Energies = -955.078111

Enthalpy = -955.077167

Free Energy = -955.150351

0 2

|    |             |             |             |
|----|-------------|-------------|-------------|
| N  | 2.53003000  | -1.62425100 | 0.99332400  |
| C  | 3.36321700  | -1.49483800 | -0.20744000 |
| C  | 4.84562900  | -1.42520600 | 0.22414900  |
| O  | 5.73145000  | -0.99646700 | -0.48666800 |
| H  | 1.64114400  | -2.07958800 | 0.78634700  |
| H  | 2.29555900  | -0.71322900 | 1.38345300  |
| H  | 3.27201900  | -2.43778900 | -0.76253500 |
| C  | 3.00992600  | -0.35513700 | -1.19364000 |
| C  | 3.07815300  | 1.02110100  | -0.60407300 |
| H  | 1.99796000  | -0.52841100 | -1.57266200 |
| H  | 3.70285300  | -0.41761200 | -2.03696000 |
| C  | 4.17019400  | 1.83793300  | -0.43554100 |
| N  | 1.96065600  | 1.69220700  | -0.11488300 |
| H  | 5.21085500  | 1.67547400  | -0.66823100 |
| H  | 4.25706700  | 3.80183400  | 0.40143800  |
| C  | 2.36565000  | 2.87569700  | 0.32812400  |
| N  | 3.70120500  | 2.99696200  | 0.14949500  |
| H  | 1.73707400  | 3.63740700  | 0.76267100  |
| O  | 5.06921300  | -1.90967100 | 1.45142000  |
| H  | 4.17316600  | -2.13030600 | 1.80864200  |
| Au | -0.05522400 | 0.96736300  | -0.03015700 |
| Au | -2.65914500 | 0.57591500  | 0.15447400  |
| Au | -1.04554100 | -1.71758700 | -0.17096500 |

$His^{(o)}-Au_3(c)$

$E_{total} = -955.2723904$  a.u.

Electronic and zero-point Energy = -955.108702

Thermal Energies = -955.091957

Enthalpy = -955.091013

Free Energy = -955.162658

0 2

|    |             |             |             |
|----|-------------|-------------|-------------|
| N  | 2.00416700  | -1.22209500 | -0.52864500 |
| C  | 2.87563800  | -1.47360100 | 0.65803000  |
| C  | 2.78919000  | -0.43401400 | 1.80175500  |
| O  | 3.56495600  | -0.53653500 | 2.72821000  |
| H  | 2.08401400  | -2.03967900 | -1.13462400 |
| H  | 2.41525200  | -0.44997200 | -1.07621300 |
| H  | 2.55082300  | -2.41671500 | 1.10494000  |
| C  | 4.35861900  | -1.61250500 | 0.22141200  |
| C  | 4.91906100  | -0.34874300 | -0.36366300 |
| H  | 4.42226800  | -2.42905600 | -0.50967100 |
| H  | 4.94133300  | -1.90736500 | 1.09667700  |
| C  | 6.04427000  | 0.35135700  | -0.00167900 |
| N  | 4.27659200  | 0.30778200  | -1.40335500 |
| H  | 6.78108200  | 0.18456900  | 0.76816100  |
| H  | 6.78525800  | 2.17308300  | -0.83902800 |
| C  | 5.00002900  | 1.37919800  | -1.66324300 |
| N  | 6.08665400  | 1.44432800  | -0.84461600 |
| H  | 4.78430100  | 2.12346200  | -2.41635700 |
| O  | 1.89555400  | 0.55967500  | 1.77240100  |
| H  | 1.22547900  | 0.50416200  | 1.05758400  |
| Au | -2.75630400 | -0.61391200 | -0.05285200 |
| Au | -1.15287700 | 1.72537500  | 0.12968000  |
| Au | -0.16887600 | -0.94447400 | -0.31145700 |

$His^{(o)}-Au_3(d)$

$E_{total} = -955.2666109$  a.u.

Electronic and zero-point Energy = -955.103728

Thermal Energies = -955.086334

Enthalpy = -955.08539

Free Energy = -955.161436

0 2

|    |             |             |             |
|----|-------------|-------------|-------------|
| N  | 6.03736100  | 0.45242400  | -0.12464700 |
| C  | 4.90901800  | -0.32813700 | 0.37175800  |
| H  | 6.83429300  | 0.35940300  | 0.50042900  |
| H  | 4.73811700  | -0.06976900 | 1.42252800  |
| C  | 3.62096100  | -0.00123500 | -0.42237600 |
| C  | 3.12654900  | 1.40197800  | -0.22880800 |
| H  | 2.81988500  | -0.68397400 | -0.12173000 |
| H  | 3.81253400  | -0.19112100 | -1.48749700 |
| C  | 3.81306000  | 2.59100800  | -0.17728900 |
| N  | 1.77266600  | 1.67935000  | -0.08317600 |
| H  | 4.86952100  | 2.78882300  | -0.24946400 |
| H  | 3.04055200  | 4.56792500  | 0.08476300  |
| C  | 1.64349100  | 2.99178000  | 0.05244600  |
| N  | 2.86157800  | 3.57772600  | 0.00121100  |
| H  | 0.71310200  | 3.52188600  | 0.18717900  |
| Au | -1.58989000 | -1.70178600 | -0.13078900 |
| Au | 0.09699700  | 0.33854500  | -0.07838700 |
| Au | -2.66425600 | 0.90088200  | 0.15902900  |
| H  | 6.34023700  | 0.07823700  | -1.02278100 |
| C  | 5.15437000  | -1.84096600 | 0.30278700  |
| O  | 5.97872500  | -2.37680800 | -0.40834100 |
| O  | 4.32635900  | -2.52602700 | 1.12138600  |
| H  | 4.49999100  | -3.47545200 | 0.99904300  |



$His^{(o)}-Au_3(e)$

$E_{total} = -955.2639946$  a.u.

Electronic and zero-point Energy = -955.100360

Thermal Energies = -955.083171

Enthalpy = -955.082227

Free Energy = -955.157395

0 2

|    |             |             |             |
|----|-------------|-------------|-------------|
| N  | 2.48619400  | -0.89272600 | -0.95697600 |
| C  | 3.62820100  | -0.16907400 | -0.35027100 |
| H  | 2.59982500  | -0.90586700 | -1.96964300 |
| H  | 3.74654700  | 0.79013800  | -0.86280300 |
| C  | 3.41003000  | 0.13011700  | 1.15715300  |
| C  | 2.49301000  | 1.29363700  | 1.38234200  |
| H  | 4.38955300  | 0.35494800  | 1.59285300  |
| H  | 3.02578600  | -0.76708100 | 1.65556200  |
| C  | 1.30641900  | 1.34799300  | 2.07932600  |
| N  | 2.79681000  | 2.53633900  | 0.86121800  |
| H  | 0.73122900  | 0.59454200  | 2.59484700  |
| H  | 0.01303600  | 3.02460700  | 2.32663900  |
| C  | 1.81174700  | 3.32792600  | 1.23216600  |
| N  | 0.88811700  | 2.65755200  | 1.98195000  |
| H  | 1.71874200  | 4.37821200  | 0.99390900  |
| Au | -2.00687100 | 0.88659800  | -0.86599000 |
| Au | -1.69371700 | -1.21812400 | 1.00016800  |
| Au | 0.39232900  | -0.23565100 | -0.62333400 |
| H  | 2.53755800  | -1.87241900 | -0.67252400 |
| C  | 4.89552400  | -0.99763300 | -0.54870100 |
| O  | 4.90509900  | -2.17573600 | -0.84633000 |
| O  | 6.01321000  | -0.27748200 | -0.33849900 |
| H  | 6.77632700  | -0.87029700 | -0.45229300 |

$His^{(o)}-Au_3(f)$

$E_{total} = -955.2611106$  a.u.

Electronic and zero-point Energy = -955.097402

Thermal Energies = -955.080444

Enthalpy = -955.0795

Free Energy = -955.152338

0 2

|    |             |             |             |
|----|-------------|-------------|-------------|
| N  | 1.62472000  | -2.20170900 | -0.15168200 |
| C  | 2.74693000  | -1.23701300 | -0.28840200 |
| H  | 1.58528000  | -2.80454400 | -0.97298600 |
| H  | 2.50717600  | -0.56070900 | -1.11163200 |
| C  | 2.90507400  | -0.41787400 | 1.03015200  |
| C  | 3.58416000  | 0.90177200  | 0.87328800  |
| H  | 3.44685300  | -1.02065300 | 1.76755700  |
| H  | 1.89083800  | -0.26842300 | 1.42195100  |
| C  | 4.84667500  | 1.35046100  | 1.19498100  |
| H  | 5.64905700  | 0.79035300  | 1.65660300  |
| C  | 3.84587900  | 3.03340600  | 0.32852000  |
| N  | 5.00142100  | 2.67439700  | 0.85224300  |
| H  | 3.59958700  | 4.01669000  | -0.04755400 |
| Au | -0.34789300 | -1.22432100 | 0.04687100  |
| Au | -0.69690300 | 1.57092900  | -0.50605000 |
| Au | -2.75566300 | -0.21675500 | 0.31071900  |
| H  | 1.81115000  | -2.82890000 | 0.63182000  |
| C  | 4.03217500  | -1.99238900 | -0.61095300 |
| O  | 4.23620200  | -3.14618900 | -0.28732200 |
| O  | 4.91561300  | -1.23064200 | -1.27379300 |
| H  | 5.73140900  | -1.74693300 | -1.39904600 |
| N  | 2.95297800  | 1.99986600  | 0.31297100  |
| H  | 1.98110800  | 2.04134600  | 0.01035600  |

$His^{(o)}-Au_3(g)$

$E_{total} = -955.2485977$  a.u.

Electronic and zero-point Energy = -955.086849

Thermal Energies = -955.07028

Enthalpy = -955.069335

Free Energy = -955.140458

0 2

|    |             |             |             |
|----|-------------|-------------|-------------|
| N  | 3.40495200  | 0.12516500  | 2.00507400  |
| C  | 3.41629600  | -0.57836500 | 0.72773200  |
| H  | 2.98771600  | -0.45948800 | 2.72487400  |
| H  | 2.41922700  | -1.00665900 | 0.55765300  |
| C  | 3.72401900  | 0.38119400  | -0.43955700 |
| C  | 2.75786200  | 1.51341400  | -0.64793600 |
| H  | 3.78992100  | -0.17923000 | -1.37641100 |
| H  | 4.71645000  | 0.82863600  | -0.27858800 |
| C  | 1.84632500  | 2.12406900  | 0.25243000  |
| N  | 2.80883200  | 2.21804900  | -1.82313400 |
| H  | 1.88755600  | 2.09525200  | 1.33395000  |
| H  | 0.72263900  | 3.92580000  | -0.11855200 |
| C  | 2.00777700  | 3.25844600  | -1.65693000 |
| N  | 1.43418300  | 3.28144100  | -0.43468700 |
| H  | 1.79978700  | 4.00537200  | -2.41184800 |
| Au | 0.24877300  | 0.54396200  | -0.07185900 |
| Au | -1.20116400 | -1.65663800 | -0.59931700 |
| Au | -2.41862200 | 0.61136400  | 0.62776000  |
| H  | 4.36084600  | 0.30476700  | 2.30780100  |
| C  | 4.41790000  | -1.74016600 | 0.69716100  |
| O  | 5.28375100  | -1.93116000 | 1.52557700  |
| O  | 4.23660200  | -2.54235900 | -0.37574500 |
| H  | 4.90619000  | -3.24684100 | -0.33580700 |

$His^{(o)}-Au_3(h)$

$E_{total} = -955.2681575$  a.u.

Electronic and zero-point Energy = -955.103929

Thermal Energies = -955.0871

Enthalpy = -955.086156

Free Energy = -955.160216

0 2

|    |             |             |             |
|----|-------------|-------------|-------------|
| N  | 2.14281900  | -0.28940300 | -1.21495400 |
| C  | 2.86935100  | 0.87103700  | -0.64559900 |
| H  | 2.22710400  | -0.25642300 | -2.23251900 |
| H  | 2.46275500  | 1.09234600  | 0.34386000  |
| C  | 4.39880500  | 0.61448700  | -0.52083400 |
| C  | 4.71722300  | -0.50777200 | 0.42175400  |
| H  | 4.87897900  | 1.53427800  | -0.17280900 |
| H  | 4.79776900  | 0.39359200  | -1.51975700 |
| C  | 5.48102900  | -0.49526600 | 1.56566900  |
| N  | 4.20952800  | -1.77900800 | 0.21324600  |
| H  | 6.03386000  | 0.28876400  | 2.06010300  |
| H  | 5.88943100  | -2.12527000 | 2.88889200  |
| C  | 4.65399700  | -2.51872100 | 1.20925200  |
| N  | 5.43436900  | -1.78685800 | 2.05359600  |
| H  | 4.44410700  | -3.56763300 | 1.36355300  |
| Au | 0.00801400  | -0.38604900 | -0.71684700 |
| Au | -2.58401400 | -0.80387800 | -0.42183500 |
| Au | -1.32824400 | 0.99803900  | 1.37405500  |
| H  | 2.58904200  | -1.15188000 | -0.88159300 |
| C  | 2.63390800  | 2.06888200  | -1.55412300 |
| O  | 2.37743700  | 1.98752800  | -2.73700600 |
| O  | 2.80018500  | 3.23578600  | -0.90326400 |
| H  | 2.65843900  | 3.95593900  | -1.54194600 |

$His^{(-)}-Au_3(a')$

$E_{total} = -954.7491579$  a.u.

Electronic and zero-point Energy = -954.599466

Thermal Energies = -954.582456

Enthalpy = -954.581512

Free Energy = -954.655426

-1 2

|    |             |             |             |
|----|-------------|-------------|-------------|
| N  | -5.18722500 | -2.00249700 | 0.88947800  |
| C  | -4.23380100 | -1.83222100 | -0.21082300 |
| C  | -2.75832100 | -1.69498100 | 0.27151400  |
| O  | -1.94333200 | -1.37039500 | -0.68656000 |
| H  | -5.50818600 | -1.08580300 | 1.19760800  |
| H  | -4.67268800 | -2.39478900 | 1.67728900  |
| H  | -4.24958100 | -2.74481700 | -0.82625600 |
| C  | -4.64943500 | -0.66305700 | -1.13536300 |
| C  | -4.51153500 | 0.69406000  | -0.50436000 |
| H  | -5.69553200 | -0.81022800 | -1.42699300 |
| H  | -4.03028200 | -0.71244900 | -2.03434300 |
| C  | -3.37281600 | 1.46252400  | -0.39116100 |
| N  | -5.57180700 | 1.33520500  | 0.12029300  |
| H  | -2.35444800 | 1.28908400  | -0.70357800 |
| H  | -3.13503200 | 3.33433200  | 0.59688600  |
| C  | -5.08086800 | 2.46192600  | 0.59945800  |
| N  | -3.75112600 | 2.58780900  | 0.31141500  |
| H  | -5.63348300 | 3.21264100  | 1.14791800  |
| O  | -2.46802300 | -1.92296300 | 1.44925500  |
| Au | 2.72653900  | -0.68577300 | 0.13870000  |
| Au | 1.23722300  | 1.71190100  | 0.00186900  |
| Au | 0.08410900  | -0.89643400 | -0.22606300 |

$His^{(-)}-Au_3(b')$

$E_{total} = -954.7399646$  a.u.

Electronic and zero-point Energy = -954.590810

Thermal Energies = -954.574466

Enthalpy = -954.573521

Free Energy = -954.644446

-1 2

|    |             |             |             |
|----|-------------|-------------|-------------|
| N  | 4.27057200  | 0.14033700  | 2.46058900  |
| C  | 3.11847000  | 0.02709800  | 1.55962800  |
| C  | 2.91666900  | -1.41380600 | 1.00762400  |
| O  | 1.87926000  | -1.64217400 | 0.25274400  |
| H  | 5.09868200  | 0.37331100  | 1.91459400  |
| H  | 4.45585500  | -0.78808000 | 2.83727200  |
| H  | 2.20525500  | 0.27236700  | 2.12161000  |
| C  | 3.22596700  | 1.06923600  | 0.41650300  |
| C  | 4.29620000  | 0.76696600  | -0.59195200 |
| H  | 3.43204100  | 2.04494500  | 0.86971700  |
| H  | 2.25632500  | 1.13668100  | -0.08512100 |
| C  | 4.22218400  | -0.09526900 | -1.66369900 |
| N  | 5.56731300  | 1.31794900  | -0.52378900 |
| H  | 3.42443000  | -0.73514100 | -2.00849500 |
| H  | 5.76125700  | -0.60735800 | -3.05397300 |
| C  | 6.24278600  | 0.79782800  | -1.52883100 |
| N  | 5.47010100  | -0.06549200 | -2.25486000 |
| H  | 7.27323400  | 1.00977300  | -1.78003400 |
| O  | 3.74416400  | -2.28942000 | 1.28281000  |
| Au | 0.03823200  | -0.58411200 | 0.13186600  |
| Au | -1.55355100 | 1.63556000  | 0.15939900  |
| Au | -2.66422500 | -0.89848000 | -0.36809100 |

$His^{(-)}-Au_3(c')$

$E_{total} = -954.7390123$  a.u.

Electronic and zero-point Energy = -954.588933

Thermal Energies = -954.572196

Enthalpy = -954.571252

Free Energy = -954.643915

-1 2

|    |             |             |             |
|----|-------------|-------------|-------------|
| N  | 2.08308200  | 0.73221300  | -0.62441100 |
| C  | 2.96876200  | -0.17433500 | -1.38118000 |
| C  | 2.86327000  | -1.64554600 | -0.83990400 |
| O  | 3.83784300  | -2.39048700 | -1.07773600 |
| H  | 1.91982800  | 1.60647500  | -1.11610900 |
| H  | 2.49540400  | 0.96582000  | 0.27710000  |
| H  | 2.57311800  | -0.20900400 | -2.40478700 |
| C  | 4.43130600  | 0.32199300  | -1.45296500 |
| C  | 5.09656600  | 0.46550800  | -0.11261100 |
| H  | 4.46367700  | 1.29930800  | -1.94928000 |
| H  | 4.98225900  | -0.39500600 | -2.06801600 |
| C  | 5.46430500  | -0.53079400 | 0.76647500  |
| N  | 5.41000800  | 1.70535100  | 0.42612200  |
| H  | 5.35135600  | -1.60216300 | 0.69816900  |
| H  | 6.36212800  | -0.31966400 | 2.69285400  |
| C  | 5.95631900  | 1.46233800  | 1.60117400  |
| N  | 6.01451600  | 0.11959400  | 1.85399100  |
| H  | 6.32150500  | 2.20429200  | 2.29821200  |
| O  | 1.79103700  | -1.96203800 | -0.23537800 |
| Au | -2.45580400 | -1.16388100 | 0.38418000  |
| Au | 0.04733100  | -0.33254000 | -0.15608300 |
| Au | -1.82870100 | 1.67332100  | -0.11416100 |

$His^{(-)}-Au_3(d')$

$E_{total} = -954.7301427$  a.u.

Electronic and zero-point Energy = -954.580704

Thermal Energies = -954.563658

Enthalpy = -954.562714

Free Energy = -954.636506

-1 2

|    |             |             |             |
|----|-------------|-------------|-------------|
| N  | 6.13446000  | 0.67362700  | -0.25088900 |
| C  | 5.16125300  | -0.25743500 | 0.36932400  |
| H  | 6.91580600  | 0.76378600  | 0.39754500  |
| H  | 5.07306100  | -0.02151800 | 1.43654400  |
| C  | 3.76516000  | -0.10131400 | -0.27189000 |
| C  | 3.15320500  | 1.26101300  | -0.13175700 |
| H  | 3.09719700  | -0.84277100 | 0.17848100  |
| H  | 3.84303800  | -0.35451800 | -1.33909900 |
| C  | 3.76798800  | 2.49074200  | -0.11003200 |
| N  | 1.78163700  | 1.47906500  | -0.00658200 |
| H  | 4.81782000  | 2.71909500  | -0.19738100 |
| H  | 2.89133600  | 4.43286700  | 0.09094100  |
| C  | 1.57837700  | 2.78817700  | 0.09177200  |
| N  | 2.76463000  | 3.43411500  | 0.03325100  |
| H  | 0.61916200  | 3.26943900  | 0.20419700  |
| Au | -1.80415800 | -1.66707800 | -0.06684000 |
| Au | 0.13362800  | 0.13638700  | -0.02243100 |
| Au | -2.61393200 | 1.03459900  | 0.06272400  |
| H  | 6.53474900  | 0.11971100  | -1.01703900 |
| C  | 5.59626200  | -1.76787200 | 0.23494800  |
| O  | 6.44236900  | -1.99956900 | -0.67378300 |
| O  | 5.03035100  | -2.56072400 | 1.02607900  |



$His^{(-)}-Au_3(e')$

$E_{total} = -954.7462652$  a.u.

Electronic and zero-point Energy = -954.596034

Thermal Energies = -954.579317

Enthalpy = -954.578373

Free Energy = -954.652125

-1 2

|    |             |             |             |
|----|-------------|-------------|-------------|
| N  | 2.54645400  | -0.75281400 | -0.99549200 |
| C  | 3.72917000  | -0.05118600 | -0.39583100 |
| H  | 2.56035700  | -0.57463000 | -1.99812700 |
| H  | 3.95433700  | 0.83408700  | -0.99603900 |
| C  | 3.51681700  | 0.39446900  | 1.06397600  |
| C  | 2.52559100  | 1.50260700  | 1.24906600  |
| H  | 4.50364800  | 0.71218800  | 1.41707000  |
| H  | 3.21678500  | -0.47100400 | 1.66732100  |
| C  | 1.32872400  | 1.47274600  | 1.93327300  |
| N  | 2.70591200  | 2.75455600  | 0.68325700  |
| H  | 0.83069100  | 0.68907900  | 2.48270600  |
| H  | -0.15629000 | 2.99951500  | 2.05367600  |
| C  | 1.64100200  | 3.45540800  | 1.01120600  |
| N  | 0.77939500  | 2.73221000  | 1.78715800  |
| H  | 1.44350500  | 4.47958500  | 0.72479300  |
| Au | -1.85875300 | 0.99584100  | -0.87177200 |
| Au | -1.82867200 | -1.18910500 | 0.87040700  |
| Au | 0.48488000  | -0.46178600 | -0.42254500 |
| H  | 2.84343200  | -1.74693100 | -0.91053100 |
| C  | 4.94502400  | -1.06071700 | -0.46413200 |
| O  | 4.61736100  | -2.25596700 | -0.72790400 |
| O  | 6.06567200  | -0.56785800 | -0.22981800 |

$His^{(-)}-Au_3(f')$

$E_{total} = -954.7538392$  a.u.

Electronic and zero-point Energy = -954.603695

Thermal Energies = -954.588219

Enthalpy = -954.587275

Free Energy = -954.654945

-1 2

|    |             |             |             |
|----|-------------|-------------|-------------|
| N  | 2.27106800  | -0.93171600 | -1.19709000 |
| C  | 3.50530300  | -0.74427200 | -0.36265000 |
| H  | 2.30862800  | -0.35666900 | -2.03518400 |
| H  | 4.24119400  | -0.20795700 | -0.97536900 |
| C  | 3.31394900  | 0.03920600  | 0.94496200  |
| C  | 3.20982200  | 1.52910900  | 0.81035600  |
| H  | 4.19235500  | -0.19455200 | 1.55339300  |
| H  | 2.44166900  | -0.36528400 | 1.47623000  |
| C  | 4.14707700  | 2.52842400  | 0.98292600  |
| H  | 5.18097000  | 2.41012700  | 1.27880400  |
| C  | 2.34947800  | 3.54011500  | 0.40973600  |
| N  | 3.60741200  | 3.77430400  | 0.73159200  |
| H  | 1.60846900  | 4.28516000  | 0.15455300  |
| Au | 0.27933700  | -0.73787400 | -0.40641400 |
| Au | -1.57106400 | 1.45580900  | -0.45380500 |
| Au | -2.14906100 | -1.04804100 | 0.67601300  |
| H  | 2.40236500  | -1.93886200 | -1.46653200 |
| C  | 4.10653600  | -2.19346600 | -0.13296800 |
| O  | 3.57787700  | -3.08340700 | -0.86442500 |
| O  | 5.03849800  | -2.27550100 | 0.68809500  |
| N  | 2.05998600  | 2.20526200  | 0.43955600  |
| H  | 1.15338500  | 1.78805600  | 0.24444600  |

$His^{(-)}-Au_3(g')$

$E_{total} = -954.7134533$  a.u.

Electronic and zero-point Energy = -954.565330

Thermal Energies = -954.548174

Enthalpy = -954.54723

Free Energy = -954.621864

-1 2

|    |             |             |             |
|----|-------------|-------------|-------------|
| N  | 3.79715500  | -0.00277900 | 1.79416800  |
| C  | 3.87309200  | -0.55946900 | 0.42397000  |
| H  | 3.33745000  | -0.69578800 | 2.38246700  |
| H  | 2.98524200  | -1.17842100 | 0.23389500  |
| C  | 3.91504200  | 0.55375300  | -0.63516800 |
| C  | 2.80656100  | 1.55291100  | -0.63382500 |
| H  | 3.99203300  | 0.09300900  | -1.62602300 |
| H  | 4.84521100  | 1.13060300  | -0.50599600 |
| C  | 1.83500000  | 1.78565100  | 0.38341500  |
| N  | 2.68458900  | 2.48707000  | -1.62935800 |
| H  | 2.04508600  | 1.58921700  | 1.43238200  |
| H  | 0.37492400  | 3.37864200  | 0.38094200  |
| C  | 1.72313200  | 3.31209500  | -1.23431500 |
| N  | 1.21460400  | 2.99360100  | -0.02960600 |
| H  | 1.35132400  | 4.14519300  | -1.81791200 |
| Au | 0.34499500  | 0.17511100  | 0.01477500  |
| Au | -1.51822800 | -1.71326900 | -0.30286800 |
| Au | -2.40713600 | 0.90786100  | 0.33281700  |
| H  | 4.77212900  | -0.02755200 | 2.11500000  |
| C  | 5.15064200  | -1.46527800 | 0.20083100  |
| O  | 6.01699300  | -1.40341900 | 1.11555600  |
| O  | 5.16431600  | -2.10467300 | -0.87853900 |

$His^{(-)}-Au_3(h')$

$E_{total} = -954.7478802$  a.u.

Electronic and zero-point Energy = -954.597405

Thermal Energies = -954.580814

Enthalpy = -954.57987

Free Energy = -954.652731

-1 2

|    |             |             |             |
|----|-------------|-------------|-------------|
| N  | 2.42794800  | -1.03573300 | 0.63026800  |
| C  | 3.40066700  | -0.71432000 | -0.46702300 |
| H  | 2.66726000  | -2.02933400 | 0.82648500  |
| H  | 2.84268000  | -0.59086600 | -1.39916000 |
| C  | 4.18308800  | 0.58125200  | -0.17435200 |
| C  | 3.29393700  | 1.74619400  | 0.14655700  |
| H  | 4.81345400  | 0.77457200  | -1.04588100 |
| H  | 4.85424600  | 0.41296700  | 0.67649100  |
| C  | 2.58235800  | 2.56195300  | -0.70473900 |
| N  | 2.97800100  | 2.06028500  | 1.46012600  |
| H  | 2.52167000  | 2.60603500  | -1.78126400 |
| H  | 1.08669500  | 3.99983900  | -0.20044400 |
| C  | 2.09079000  | 3.03356000  | 1.39792200  |
| N  | 1.82757700  | 3.38714700  | 0.10737700  |
| H  | 1.61219600  | 3.51154300  | 2.24120500  |
| Au | 0.32794000  | -0.74061200 | 0.29202500  |
| Au | -2.32600900 | -1.13802500 | 0.04656300  |
| Au | -1.39542400 | 1.46416000  | -0.36707200 |
| H  | 2.66101700  | -0.49492100 | 1.46450000  |
| C  | 4.36517700  | -1.94787500 | -0.64659200 |
| O  | 4.11787900  | -2.92467600 | 0.11933400  |
| O  | 5.24411200  | -1.81190500 | -1.52267000 |

$His^{(o)}-Ag_3(i)$

$E_{total} = -986.181893$  a.u.

Electronic and zero-point Energy = -986.019074

Thermal Energies = -986.002131

Enthalpy = -986.001187

Free Energy = -986.073576

0 2

|    |             |             |             |
|----|-------------|-------------|-------------|
| N  | 4.87831800  | 1.10075400  | -0.89262600 |
| C  | 4.38397800  | 0.45255500  | 0.33446900  |
| C  | 3.50237300  | -0.74099700 | -0.08803300 |
| O  | 2.82859800  | -1.38803200 | 0.70573500  |
| H  | 5.85835300  | 1.35295100  | -0.82797700 |
| H  | 4.33045800  | 1.93992600  | -1.09832900 |
| H  | 5.23366300  | 0.02066300  | 0.87757400  |
| C  | 3.60631500  | 1.38534900  | 1.29682200  |
| C  | 2.37834000  | 1.96698600  | 0.66314200  |
| H  | 4.28885000  | 2.18234700  | 1.61513900  |
| H  | 3.32631100  | 0.81141500  | 2.18404400  |
| C  | 1.05733800  | 1.70964300  | 0.95111400  |
| N  | 2.46288600  | 2.83235900  | -0.41644200 |
| H  | 0.58500600  | 1.08024500  | 1.68870900  |
| H  | -0.67856000 | 2.39758100  | -0.06770300 |
| C  | 1.21510000  | 3.08718500  | -0.76884000 |
| N  | 0.33004600  | 2.43719400  | 0.03613600  |
| H  | 0.90579500  | 3.72747700  | -1.58277700 |
| O  | 3.53007200  | -1.00363700 | -1.38493500 |
| H  | 4.13474300  | -0.29721000 | -1.75655800 |
| Ag | -3.42609200 | 1.23403500  | 0.01093800  |
| Ag | -1.99373800 | -1.06299800 | -0.14191700 |
| Ag | 0.53869500  | -1.99738800 | 0.10927600  |

$His^{(o)}-Ag_3(j)$

$E_{total} = -986.1766233$  a.u.

Electronic and zero-point Energy = -986.013619

Thermal Energies = -985.996602

Enthalpy = -985.995658

Free Energy = -986.069585

0 2

|    |             |             |             |
|----|-------------|-------------|-------------|
| N  | 1.58259700  | -1.06344400 | -0.24860800 |
| C  | 2.51925200  | -1.20082600 | 0.89467900  |
| C  | 2.58905100  | 0.03282300  | 1.81729300  |
| O  | 3.37772400  | 0.06061300  | 2.73564600  |
| H  | 1.44245500  | -1.99308200 | -0.64275600 |
| H  | 2.05550900  | -0.53316200 | -0.99090500 |
| H  | 2.14051800  | -2.00833800 | 1.53154700  |
| C  | 3.95612200  | -1.57315400 | 0.43909500  |
| C  | 4.60238300  | -0.50669200 | -0.39585000 |
| H  | 3.89690500  | -2.51235400 | -0.12642200 |
| H  | 4.56079800  | -1.76105800 | 1.32916500  |
| C  | 5.77572000  | 0.17436300  | -0.17178500 |
| N  | 4.01070800  | -0.04431600 | -1.56234900 |
| H  | 6.49824700  | 0.12254900  | 0.62789500  |
| H  | 6.64913700  | 1.71821800  | -1.36494900 |
| C  | 4.81074000  | 0.89342300  | -2.03069600 |
| N  | 5.89772400  | 1.05864200  | -1.22527800 |
| H  | 4.65344000  | 1.47069700  | -2.93082000 |
| O  | 1.76746900  | 1.06919400  | 1.58669000  |
| H  | 1.13624700  | 0.88788300  | 0.86496300  |
| Ag | -2.31451100 | 1.71631000  | 0.07049600  |
| Ag | -0.71629600 | -0.46807200 | -0.14222900 |
| Ag | -3.35539700 | -1.05686900 | -0.24612200 |

$His^{(o)}-Ag_3(\mathbf{k})$

$E_{\text{total}} = -986.1895962$  a.u.

Electronic and zero-point Energy = -986.026324

Thermal Energies = -986.009394

Enthalpy = -986.00845

Free Energy = -986.079899

0 2

|    |             |             |             |
|----|-------------|-------------|-------------|
| N  | -2.22468100 | -1.66574200 | -0.83784100 |
| C  | -3.04149400 | -1.43204900 | 0.35958200  |
| C  | -4.52650600 | -1.34364400 | -0.06065600 |
| O  | -5.39261500 | -0.86156700 | 0.63960900  |
| H  | -1.36260300 | -2.16234500 | -0.61760500 |
| H  | -1.94835600 | -0.78830700 | -1.27457600 |
| H  | -2.97421900 | -2.33790300 | 0.97644800  |
| C  | -2.64102300 | -0.23588900 | 1.25627600  |
| C  | -2.64830600 | 1.09087200  | 0.55674800  |
| H  | -1.63739800 | -0.42373800 | 1.65135100  |
| H  | -3.33463700 | -0.20564000 | 2.10086500  |
| C  | -3.70597800 | 1.93909600  | 0.32523700  |
| N  | -1.50052900 | 1.65166400  | 0.00828900  |
| H  | -4.75132400 | 1.85206800  | 0.57747500  |
| H  | -3.70281100 | 3.82398400  | -0.68132800 |
| C  | -1.85648400 | 2.80684300  | -0.53235600 |
| N  | -3.18578300 | 3.01716700  | -0.36234600 |
| H  | -1.19976000 | 3.50087300  | -1.03572300 |
| O  | -4.77690200 | -1.87759400 | -1.26252100 |
| H  | -3.89141900 | -2.14182100 | -1.61605100 |
| Ag | 3.31470900  | 0.64561700  | -0.07961500 |
| Ag | 0.62708900  | 0.77059600  | 0.03536800  |
| Ag | 1.69765600  | -1.78167900 | 0.08290100  |

$His^{(o)}-Ag_3(l)$

$E_{total} = -986.1843858$  a.u.

Electronic and zero-point Energy = -986.021917

Thermal Energies = -986.004373

Enthalpy = -986.003428

Free Energy = -986.078703

0 2

|    |             |             |             |
|----|-------------|-------------|-------------|
| N  | 5.38010100  | 0.15534600  | -0.22947300 |
| C  | 4.18870000  | -0.49836800 | 0.30191100  |
| H  | 6.18952900  | -0.06171700 | 0.34693000  |
| H  | 4.09422600  | -0.24589100 | 1.36376200  |
| C  | 2.91700300  | -0.00400700 | -0.42827600 |
| C  | 2.58651200  | 1.43929800  | -0.17896400 |
| H  | 2.05830600  | -0.60583500 | -0.11299200 |
| H  | 3.04605600  | -0.18427400 | -1.50476600 |
| C  | 3.40605300  | 2.54073800  | -0.10081300 |
| N  | 1.27164900  | 1.84820300  | -0.00528500 |
| H  | 4.47672300  | 2.62609400  | -0.18580800 |
| H  | 2.85686300  | 4.57976800  | 0.23770800  |
| C  | 1.29468200  | 3.15875500  | 0.17323300  |
| N  | 2.57000100  | 3.61845300  | 0.12437200  |
| H  | 0.43399700  | 3.78973400  | 0.33927100  |
| H  | 5.58680200  | -0.21712900 | -1.15508800 |
| C  | 4.24753700  | -2.02733600 | 0.19407800  |
| O  | 4.96133800  | -2.64173000 | -0.57142800 |
| O  | 3.38799000  | -2.62757900 | 1.04636900  |
| H  | 3.43131100  | -3.58712800 | 0.89197300  |
| Ag | -3.36511900 | 0.63937300  | 0.06677900  |
| Ag | -0.64005300 | 0.56849600  | -0.01991400 |
| Ag | -1.85362900 | -1.86632900 | -0.11101100 |



$His^{(o)}-Ag_3(m)$

$E_{total} = -986.1844895$  a.u.

Electronic and zero-point Energy = -986.004122

Thermal Energies = -986.004122

Enthalpy = -986.003178

Free Energy = -986.077698

0 2

|    |             |             |             |
|----|-------------|-------------|-------------|
| N  | 2.11521300  | -1.18052800 | -0.68556400 |
| C  | 3.28116700  | -0.32637600 | -0.40554300 |
| H  | 2.10828000  | -1.43669800 | -1.67110200 |
| H  | 3.33583900  | 0.45906800  | -1.16551100 |
| C  | 3.16174900  | 0.37374500  | 0.97459600  |
| C  | 2.12833800  | 1.45913700  | 0.97452800  |
| H  | 4.13775300  | 0.80720000  | 1.21829500  |
| H  | 2.93244400  | -0.37405100 | 1.74279200  |
| C  | 1.00183500  | 1.59363300  | 1.75917200  |
| N  | 2.23942600  | 2.53640600  | 0.11702000  |
| H  | 0.58317100  | 0.97993500  | 2.54183200  |
| H  | -0.45472300 | 3.15324900  | 1.69528900  |
| C  | 1.20462800  | 3.30841600  | 0.37720100  |
| N  | 0.43138400  | 2.79027500  | 1.37498500  |
| H  | 0.96758200  | 4.23827700  | -0.12037300 |
| H  | 2.22444000  | -2.06029700 | -0.17990500 |
| C  | 4.56935700  | -1.14566700 | -0.45816000 |
| O  | 4.62000400  | -2.35733400 | -0.38878600 |
| O  | 5.66568400  | -0.36714300 | -0.56889800 |
| H  | 6.44491100  | -0.94967400 | -0.56550800 |
| Ag | -2.39754200 | 0.73282800  | -1.17582300 |
| Ag | -0.10205600 | -0.42789400 | -0.26480600 |
| Ag | -2.39720700 | -1.23305300 | 0.99785900  |

$His^{(o)}-Ag_3(n)$

$E_{total} = -986.179892$  a.u.

Electronic and zero-point Energy = -986.016691

Thermal Energies = -985.999569

Enthalpy = -985.998624

Free Energy = -986.070869

0 2

|    |             |             |             |
|----|-------------|-------------|-------------|
| N  | -1.09548300 | -2.20769000 | 0.09380400  |
| C  | -2.19651600 | -1.24156100 | 0.30063200  |
| H  | -1.02186300 | -2.82759000 | 0.89926600  |
| H  | -1.94455600 | -0.62225500 | 1.16512300  |
| C  | -2.33540900 | -0.34120000 | -0.95974900 |
| C  | -3.19288900 | 0.86813800  | -0.78072400 |
| H  | -2.73278300 | -0.94616300 | -1.78268500 |
| H  | -1.31746100 | -0.04037500 | -1.24049900 |
| C  | -4.47597700 | 1.17259700  | -1.18069000 |
| H  | -5.15450700 | 0.55121800  | -1.75011300 |
| C  | -3.78624300 | 2.89905000  | -0.11753500 |
| N  | -4.83686000 | 2.43442400  | -0.76324800 |
| H  | -3.70642700 | 3.87349900  | 0.34410200  |
| H  | -1.32452100 | -2.81280200 | -0.69538900 |
| C  | -3.51187400 | -1.96959000 | 0.56860200  |
| O  | -3.83988300 | -2.99837900 | 0.01143000  |
| O  | -4.27140000 | -1.33873200 | 1.48121300  |
| H  | -5.11694700 | -1.81568500 | 1.55450900  |
| N  | -2.76441000 | 1.99165500  | -0.09384600 |
| H  | -1.83599800 | 2.13308500  | 0.29331000  |
| Ag | 1.25482200  | 1.54710700  | 0.64007800  |
| Ag | 0.98609000  | -1.14306800 | -0.11399500 |
| Ag | 3.43815300  | -0.11998300 | -0.36372000 |

$His^{(o)}-Ag_3(o)$

$E_{total} = -986.183589$  a.u.

Electronic and zero-point Energy = -986.020588

Thermal Energies = -986.004197

Enthalpy = -986.003252

Free Energy = -986.072901

0 2

|    |             |             |             |
|----|-------------|-------------|-------------|
| N  | 1.99681500  | -1.33298800 | -0.14188500 |
| C  | 3.26843600  | -0.60103500 | -0.25950200 |
| H  | 1.88024300  | -1.95120600 | -0.94285500 |
| H  | 3.35749600  | -0.20505300 | -1.27553300 |
| C  | 3.32681000  | 0.60625800  | 0.71355000  |
| C  | 2.39208700  | 1.70356400  | 0.30714500  |
| H  | 4.35403600  | 0.98690900  | 0.71806600  |
| H  | 3.09749600  | 0.26544300  | 1.73004800  |
| C  | 1.35890400  | 2.27704500  | 1.01758700  |
| N  | 2.50679100  | 2.30639100  | -0.93063600 |
| H  | 0.96877200  | 2.09579900  | 2.00707800  |
| H  | 0.00626300  | 3.78845400  | 0.36302300  |
| C  | 1.56514500  | 3.22760800  | -0.96653900 |
| N  | 0.85473900  | 3.26467300  | 0.19688800  |
| H  | 1.35740700  | 3.88745500  | -1.79718800 |
| H  | 2.04902200  | -1.95421400 | 0.66661300  |
| C  | 4.44968500  | -1.53135300 | 0.00778300  |
| O  | 4.37195000  | -2.59619400 | 0.58699400  |
| O  | 5.61300300  | -1.02538900 | -0.45201200 |
| H  | 6.32115300  | -1.65051500 | -0.21888600 |
| Ag | -2.44939700 | 1.17890300  | 0.09945200  |
| Ag | -0.14978800 | -0.29533900 | -0.00873000 |
| Ag | -2.48478000 | -1.73568000 | -0.11457100 |

$His^{(o)}-Ag_3(p)$

$E_{total} = -954.7478802$  a.u.

Electronic and zero-point Energy = -986.022497

Thermal Energies = -986.005466

Enthalpy = -986.004522

Free Energy = -986.078143

0 2

|    |             |             |             |
|----|-------------|-------------|-------------|
| N  | 1.64884400  | 0.17564100  | -1.20594200 |
| C  | 2.41054700  | 1.04201000  | -0.28635100 |
| H  | 1.68641100  | 0.57924600  | -2.14224000 |
| H  | 2.05625500  | 0.87788200  | 0.73585700  |
| C  | 3.94708500  | 0.78809500  | -0.32145000 |
| C  | 4.31267600  | -0.58886100 | 0.14688600  |
| H  | 4.44212800  | 1.53077500  | 0.31225000  |
| H  | 4.30050500  | 0.94265000  | -1.34937000 |
| C  | 5.10936200  | -0.95965200 | 1.20581300  |
| N  | 3.82959700  | -1.71871200 | -0.49170900 |
| H  | 5.65793400  | -0.38469700 | 1.93615800  |
| H  | 5.59887800  | -2.93946200 | 1.85139600  |
| C  | 4.32201900  | -2.74877500 | 0.16616500  |
| N  | 5.10866900  | -2.34120600 | 1.20263300  |
| H  | 4.14512300  | -3.79048800 | -0.06161600 |
| H  | 2.09645400  | -0.74402100 | -1.23957800 |
| C  | 2.13738400  | 2.49232700  | -0.65570000 |
| O  | 1.78356900  | 2.86781600  | -1.75394400 |
| O  | 2.38277000  | 3.33122400  | 0.37176400  |
| H  | 2.21083600  | 4.23672400  | 0.06072900  |
| Ag | -2.05689900 | 0.55604000  | 1.59874300  |
| Ag | -3.16370500 | -0.92048100 | -0.68517400 |
| Ag | -0.58938300 | -0.12198200 | -0.63938100 |

$His^{(-)}-Ag_3(i')$

$E_{total} = -985.664168$  a.u.

Electronic and zero-point Energy = -985.514711

Thermal Energies = -985.497631

Enthalpy = -985.496687

Free Energy = -985.568954

-1 2

|    |             |             |             |
|----|-------------|-------------|-------------|
| N  | 4.82990200  | 0.58465100  | -1.09645500 |
| C  | 4.31238700  | 0.20983800  | 0.22587000  |
| C  | 3.15417900  | -0.82363600 | 0.19547800  |
| O  | 2.63100900  | -1.14397600 | 1.30063900  |
| H  | 4.30005800  | 1.38413900  | -1.44173400 |
| H  | 4.60935000  | -0.17684400 | -1.73616300 |
| H  | 5.12427200  | -0.25819400 | 0.80220700  |
| C  | 3.86164300  | 1.46758400  | 1.01705800  |
| C  | 2.59582100  | 2.08404400  | 0.49190300  |
| H  | 4.67080100  | 2.20617900  | 0.97461400  |
| H  | 3.71669700  | 1.17171500  | 2.05894800  |
| C  | 1.29918900  | 1.75038600  | 0.82118600  |
| N  | 2.58860000  | 3.04251200  | -0.51032200 |
| H  | 0.90206200  | 1.02200100  | 1.51009400  |
| H  | -0.51549400 | 2.43675400  | -0.05536900 |
| C  | 1.31499800  | 3.26986800  | -0.77929100 |
| N  | 0.49359500  | 2.51683500  | 0.00767800  |
| H  | 0.93794900  | 3.96230800  | -1.51940300 |
| O  | 2.77396500  | -1.25994400 | -0.93475500 |
| Ag | -3.33797100 | 1.26418700  | 0.03938000  |
| Ag | -2.00430700 | -1.12132000 | -0.05260200 |
| Ag | 0.62739600  | -1.91463700 | -0.07528400 |

$His^{(-)}-Ag_3(j')$

$E_{total} = -985.6583933$  a.u.

Electronic and zero-point Energy = -985.509275

Thermal Energies = -985.49207

Enthalpy = -985.491125

Free Energy = -985.564868

-1 2

|    |             |             |             |
|----|-------------|-------------|-------------|
| N  | -3.77765700 | -2.52515300 | -0.28710500 |
| C  | -2.61861300 | -1.62811100 | -0.18296400 |
| C  | -2.37861300 | -1.11004300 | 1.27137500  |
| O  | -1.41550500 | -0.26711700 | 1.43450600  |
| H  | -4.58785400 | -1.99334300 | -0.60032900 |
| H  | -3.99788700 | -2.82140800 | 0.66425000  |
| H  | -1.71279900 | -2.19533100 | -0.44967100 |
| C  | -2.72458300 | -0.46626200 | -1.20042200 |
| C  | -3.80534800 | 0.53009900  | -0.88611500 |
| H  | -2.92257200 | -0.88860100 | -2.19196100 |
| H  | -1.75661500 | 0.04167200  | -1.24523300 |
| C  | -3.81547100 | 1.47527300  | 0.11681900  |
| N  | -4.99967200 | 0.58338700  | -1.58969400 |
| H  | -3.09144200 | 1.69913600  | 0.88550900  |
| H  | -5.37593400 | 2.84192500  | 0.62484900  |
| C  | -5.71319000 | 1.53593400  | -1.02263100 |
| N  | -5.03749700 | 2.11114600  | 0.01784400  |
| H  | -6.70450900 | 1.85073600  | -1.31948600 |
| O  | -3.12051100 | -1.52644200 | 2.17616500  |
| Ag | 2.74023800  | 1.58139300  | 0.09939800  |
| Ag | 0.60511800  | -0.12194400 | 0.56418400  |
| Ag | 2.81371700  | -1.19122100 | -0.68096500 |

$His^{(-)}-Ag_3(k')$

$E_{total} = -985.6613444$  a.u.

Electronic and zero-point Energy = -985.511719

Thermal Energies = -985.494908

Enthalpy = -985.493964

Free Energy = -985.566249

-1 2

|    |             |             |             |
|----|-------------|-------------|-------------|
| N  | 1.53639400  | -0.27400100 | -1.08764500 |
| C  | 2.40508700  | -1.35949200 | -0.59241400 |
| C  | 2.29819500  | -1.52874800 | 0.96930300  |
| O  | 3.26521700  | -2.09907400 | 1.52164300  |
| H  | 1.44969800  | -0.31153400 | -2.10020700 |
| H  | 1.94902900  | 0.63009200  | -0.86398500 |
| H  | 2.00221500  | -2.29253500 | -1.01076400 |
| C  | 3.87531800  | -1.23469600 | -1.06294700 |
| C  | 4.56161700  | 0.01798900  | -0.59459200 |
| H  | 3.91033000  | -1.24471600 | -2.15940200 |
| H  | 4.41129200  | -2.11299300 | -0.69241700 |
| C  | 4.91845000  | 0.35968700  | 0.69251200  |
| N  | 4.90765200  | 1.04343400  | -1.46394300 |
| H  | 4.78201300  | -0.17379600 | 1.62100900  |
| H  | 5.83900500  | 2.16492100  | 1.36824000  |
| C  | 5.46110400  | 1.97985400  | -0.71871200 |
| N  | 5.49424400  | 1.61229000  | 0.59815000  |
| H  | 5.84905100  | 2.92623500  | -1.07053200 |
| O  | 1.23961000  | -1.10833000 | 1.53076200  |
| Ag | -3.15437200 | -0.97892200 | -0.46098000 |
| Ag | -0.54800400 | -0.30210600 | 0.24845100  |
| Ag | -2.48736700 | 1.70643000  | 0.25516700  |

$His^{(-)}-Ag_3(I')$

$E_{total} = -985.6546256$  a.u.

Electronic and zero-point Energy = -985.505726

Thermal Energies = -985.488391

Enthalpy = -985.487447

Free Energy = -985.562986

-1 2

|    |             |             |             |
|----|-------------|-------------|-------------|
| N  | 4.38002100  | -0.93069100 | 1.77769700  |
| C  | 3.50748900  | -0.86221400 | 0.58868900  |
| H  | 3.82716000  | -1.29152700 | 2.55417100  |
| H  | 2.59487400  | -0.32079700 | 0.86684100  |
| C  | 4.20873400  | -0.08967700 | -0.54857300 |
| C  | 4.48405100  | 1.36306300  | -0.27516000 |
| H  | 3.59265600  | -0.14695400 | -1.45181000 |
| H  | 5.14636200  | -0.61445100 | -0.78219900 |
| C  | 4.79736500  | 1.98780400  | 0.91207500  |
| N  | 4.45832300  | 2.29839700  | -1.30010700 |
| H  | 4.91739100  | 1.58464900  | 1.90430900  |
| H  | 5.16892400  | 4.06900500  | 1.24934000  |
| C  | 4.74243500  | 3.45751600  | -0.74444900 |
| N  | 4.95914100  | 3.32722300  | 0.59946500  |
| H  | 4.79903200  | 4.40974100  | -1.25455000 |
| H  | 5.05269200  | -1.67535600 | 1.58040700  |
| C  | 3.12263000  | -2.27701200 | 0.05538900  |
| O  | 3.97730400  | -3.17460400 | 0.17686200  |
| O  | 1.97445000  | -2.41248000 | -0.50539700 |
| Ag | -2.24861200 | 0.12826800  | -0.12058500 |
| Ag | -4.88955200 | 0.69264000  | 0.26333700  |
| Ag | 0.14940300  | -1.15407900 | -0.34499500 |



$His^{(-)}-Ag_3(m')$

$E_{total} = -985.658558$  a.u.

Electronic and zero-point Energy = -985.508779

Thermal Energies = -985.492899

Enthalpy = -985.491955

Free Energy = -985.559885

-1 2

|    |             |             |             |
|----|-------------|-------------|-------------|
| N  | 2.13637800  | -0.97510400 | -0.91375400 |
| C  | 3.36209300  | -0.23950000 | -0.48118600 |
| H  | 2.10211600  | -0.94965600 | -1.93084400 |
| H  | 3.62084200  | 0.50361900  | -1.24094700 |
| C  | 3.17708000  | 0.49650400  | 0.86131900  |
| C  | 2.15950300  | 1.59566700  | 0.84117000  |
| H  | 4.16126900  | 0.89920400  | 1.12254600  |
| H  | 2.90717300  | -0.23212800 | 1.63628300  |
| C  | 0.98129000  | 1.68156200  | 1.55647800  |
| N  | 2.29096200  | 2.71394400  | 0.03279800  |
| H  | 0.53687900  | 1.03357100  | 2.29618700  |
| H  | -0.52603800 | 3.19284900  | 1.43763200  |
| C  | 1.22249100  | 3.44995500  | 0.25469000  |
| N  | 0.39989900  | 2.88184000  | 1.18518200  |
| H  | 0.99278000  | 4.39275400  | -0.22338900 |
| H  | 2.39574800  | -1.95363900 | -0.69363000 |
| C  | 4.55273600  | -1.26928400 | -0.34434400 |
| O  | 4.20722000  | -2.48589300 | -0.39590800 |
| O  | 5.68348200  | -0.76326700 | -0.17899700 |
| Ag | -2.30562400 | -1.09465600 | 1.13421200  |
| Ag | 0.00060800  | -0.48513400 | -0.28221300 |
| Ag | -2.41494600 | 0.56856700  | -1.19376400 |

$His^{(o)}-Ag_3(n')$

$E_{total} = -985.6647644$  a.u.

Electronic and zero-point Energy = -985.514959

Thermal Energies = -985.498358

Enthalpy = -985.497414

Free Energy = -985.570033

-1 2

|    |             |             |             |
|----|-------------|-------------|-------------|
| N  | -1.73600200 | -1.10197100 | 1.22967700  |
| C  | -2.93309100 | -1.18097300 | 0.34437600  |
| H  | -1.90677100 | -0.49847100 | 2.03010000  |
| H  | -3.82595500 | -0.93304100 | 0.93641800  |
| C  | -2.89138400 | -0.22762800 | -0.85982900 |
| C  | -3.08779800 | 1.22419300  | -0.53974600 |
| H  | -3.68796300 | -0.55775600 | -1.53223100 |
| H  | -1.94473300 | -0.37812800 | -1.39891500 |
| C  | -4.21323800 | 2.02447200  | -0.54838200 |
| H  | -5.21706500 | 1.73667700  | -0.83091600 |
| C  | -2.62718300 | 3.30174500  | 0.11450300  |
| N  | -3.92129800 | 3.31137000  | -0.13978000 |
| H  | -2.03775000 | 4.14417300  | 0.44973900  |
| H  | -1.66174600 | -2.08562500 | 1.55006300  |
| C  | -3.11300600 | -2.69770000 | -0.07522100 |
| O  | -2.47651500 | -3.51006700 | 0.65663400  |
| O  | -3.88621600 | -2.91217600 | -1.03145700 |
| N  | -2.07930700 | 2.06863200  | -0.10601900 |
| H  | -1.09651500 | 1.82898200  | -0.00785500 |
| Ag | 1.86190400  | 1.66654100  | 0.15457200  |
| Ag | 2.90690200  | -0.94216400 | -0.46341400 |
| Ag | 0.32972200  | -0.64969100 | 0.40034800  |

$His^{(\circ)}-Ag_3(\mathbf{o}')$

$E_{\text{total}} = -985.6556695$  a.u.

Electronic and zero-point Energy = -985.506555

Thermal Energies = -985.489427

Enthalpy = -985.488483

Free Energy = -985.560911

-1 2

|    |             |             |             |
|----|-------------|-------------|-------------|
| N  | 4.96239900  | 0.15395700  | 1.86268500  |
| C  | 3.78071100  | 0.23318000  | 0.98118700  |
| H  | 5.05254300  | -0.80669200 | 2.19050000  |
| H  | 2.92806000  | -0.18120300 | 1.53293400  |
| C  | 3.50859900  | 1.72878800  | 0.67989300  |
| C  | 2.15676900  | 2.04334600  | 0.10315300  |
| H  | 4.27004300  | 2.09534800  | -0.01683800 |
| H  | 3.64975600  | 2.26594700  | 1.62686800  |
| C  | 0.91116800  | 1.70524500  | 0.59826000  |
| N  | 2.00554000  | 2.77513700  | -1.06027900 |
| H  | 0.59984100  | 1.17201200  | 1.48274400  |
| H  | -1.00314600 | 2.06203900  | -0.26809100 |
| C  | 0.70417600  | 2.86461600  | -1.26587100 |
| N  | -0.00608200 | 2.24548500  | -0.28166200 |
| H  | 0.22924400  | 3.35726900  | -2.10325700 |
| H  | 5.77286200  | 0.29244900  | 1.25544600  |
| C  | 3.99014800  | -0.58392900 | -0.33308600 |
| O  | 5.12552200  | -0.53650200 | -0.84028300 |
| O  | 3.00196700  | -1.26286700 | -0.80036200 |
| Ag | -3.79499600 | 0.74595500  | 0.19684600  |
| Ag | -1.85639900 | -1.17808200 | 0.07599900  |
| Ag | 0.85221400  | -1.27067500 | -0.28990000 |

$His^{(\circ)}-Ag_3(p')$

$E_{total} = -985.6589518$  a.u.

Electronic and zero-point Energy = -985.508992

Thermal Energies = -985.492217

Enthalpy = -985.491272

Free Energy = -985.563932

-1 2

|    |             |             |             |
|----|-------------|-------------|-------------|
| N  | 1.96872200  | -1.13017800 | 0.68374700  |
| C  | 2.98916700  | -0.80260700 | -0.35840400 |
| H  | 2.15931900  | -2.13200100 | 0.85912500  |
| H  | 2.47396800  | -0.62829800 | -1.31010000 |
| C  | 3.78759800  | 0.46565300  | -0.00126500 |
| C  | 2.92069500  | 1.66459700  | 0.24982500  |
| H  | 4.48906600  | 0.63982400  | -0.82125800 |
| H  | 4.38408500  | 0.27403600  | 0.89932500  |
| C  | 2.32701200  | 2.51101000  | -0.66116300 |
| N  | 2.52139200  | 2.01372300  | 1.53157800  |
| H  | 2.36226600  | 2.55051200  | -1.73906900 |
| H  | 0.90296500  | 4.06010000  | -0.28687600 |
| C  | 1.70181000  | 3.03707400  | 1.39271300  |
| N  | 1.55986200  | 3.38878500  | 0.08230300  |
| H  | 1.19231800  | 3.55605400  | 2.19284800  |
| H  | 2.19667400  | -0.63582600 | 1.54640100  |
| C  | 3.94173700  | -2.04002100 | -0.57545700 |
| O  | 3.66000900  | -3.05665800 | 0.12131100  |
| O  | 4.84868400  | -1.87023000 | -1.42062200 |
| Ag | -1.93761800 | 1.32518400  | -0.65587400 |
| Ag | -2.89337900 | -1.21765800 | 0.24178200  |
| Ag | -0.20279400 | -0.68603300 | 0.25862800  |

$His^{(o)}-Cu_3(q)$

$E_{total} = -1137.305095$  a.u.

Electronic and zero-point Energy = -1137.141358

Thermal Energies = -1137.125003

Enthalpy = -1137.124059

Free Energy = -1137.192266

0 2

|    |             |             |             |
|----|-------------|-------------|-------------|
| N  | 3.76540800  | -1.81701200 | -0.75740700 |
| C  | 2.87958400  | -1.74102800 | 0.41682400  |
| C  | 1.43089800  | -1.69785600 | -0.09948300 |
| O  | 0.47279700  | -1.51853300 | 0.65248100  |
| H  | 4.49245200  | -2.51549100 | -0.64995800 |
| H  | 4.19766400  | -0.90888000 | -0.94275800 |
| H  | 2.96983400  | -2.66440300 | 1.00188500  |
| C  | 3.14382000  | -0.53220600 | 1.35064300  |
| C  | 2.98046800  | 0.77759700  | 0.63967700  |
| H  | 4.16177000  | -0.62746200 | 1.74546000  |
| H  | 2.45015600  | -0.58831200 | 2.19345000  |
| C  | 1.96362200  | 1.69806100  | 0.74968200  |
| N  | 3.87346000  | 1.17594100  | -0.34379400 |
| H  | 1.07314500  | 1.72947100  | 1.35862800  |
| H  | 1.67656000  | 3.48113800  | -0.37828400 |
| C  | 3.40407400  | 2.31685900  | -0.81269300 |
| N  | 2.25282200  | 2.67582000  | -0.17699900 |
| H  | 3.85355600  | 2.91429000  | -1.59327300 |
| O  | 1.30219900  | -1.85762900 | -1.39944300 |
| H  | 2.24820600  | -1.96387600 | -1.71643900 |
| Cu | -2.09837800 | 1.52248900  | -0.05744000 |
| Cu | -1.33879700 | -0.75665400 | 0.19880000  |
| Cu | -3.64489200 | -0.45614500 | -0.12630900 |

$His^{(o)}-Cu_3(\mathbf{r})$

$E_{\text{total}} = -1137.31513$  a.u.

Electronic and zero-point Energy = -1137.151210

Thermal Energies = -1137.134743

Enthalpy = -1137.133799

Free Energy = -1137.202109

0 2

|    |             |             |             |
|----|-------------|-------------|-------------|
| N  | -1.56489200 | -1.73080900 | -0.79106800 |
| C  | -2.40722500 | -1.41743900 | 0.36962700  |
| C  | -3.85919600 | -1.20064600 | -0.11353200 |
| O  | -4.70698900 | -0.63571000 | 0.54595400  |
| H  | -0.75005300 | -2.28252100 | -0.52666500 |
| H  | -1.20207100 | -0.88397100 | -1.22531000 |
| H  | -2.44663400 | -2.32226300 | 0.99052400  |
| C  | -1.94185000 | -0.25781200 | 1.28330300  |
| C  | -1.79746900 | 1.06064600  | 0.58452200  |
| H  | -0.97844700 | -0.53321400 | 1.72431400  |
| H  | -2.66936900 | -0.15983100 | 2.09343600  |
| C  | -2.75058400 | 2.01946900  | 0.33838400  |
| N  | -0.58627300 | 1.49424300  | 0.05145500  |
| H  | -3.80277400 | 2.04740200  | 0.57463100  |
| H  | -2.52607800 | 3.89360400  | -0.66453300 |
| C  | -0.80603500 | 2.68337300  | -0.49339900 |
| N  | -2.10562900 | 3.03444000  | -0.34056500 |
| H  | -0.06801900 | 3.29913800  | -0.98525900 |
| O  | -4.10612500 | -1.72264500 | -1.32151100 |
| H  | -3.23428100 | -2.06941000 | -1.63530900 |
| Cu | 1.16721100  | 0.53403400  | 0.05895800  |
| Cu | 3.51795400  | 0.44320300  | -0.20630600 |
| Cu | 2.18912300  | -1.63353900 | 0.20274200  |

$His^{(o)}-Cu_3(s)$

$E_{total} = -1137.301671$  a.u.

Electronic and zero-point Energy = -955.094837

Thermal Energies = -1137.12171

Enthalpy = -1137.120766

Free Energy = -1137.189142

0 2

|    |             |             |             |
|----|-------------|-------------|-------------|
| N  | -0.63686900 | -0.39634900 | -0.95232200 |
| C  | -1.50537900 | 0.79129100  | -1.17788700 |
| C  | -1.57171000 | 1.79351900  | -0.00408200 |
| O  | -2.38873000 | 2.68839300  | -0.03504400 |
| H  | -0.56586300 | -0.88581200 | -1.84559000 |
| H  | -1.14976200 | -1.05051000 | -0.34596200 |
| H  | -1.06503700 | 1.35790700  | -2.00674500 |
| C  | -2.94538900 | 0.37859000  | -1.57897000 |
| C  | -3.66794500 | -0.36529900 | -0.49408500 |
| H  | -2.87772000 | -0.24195200 | -2.48267300 |
| H  | -3.50209700 | 1.28087300  | -1.83986100 |
| C  | -4.86625300 | -0.06541900 | 0.10933100  |
| N  | -3.13578200 | -1.51447200 | 0.07242800  |
| H  | -5.55886800 | 0.75013700  | -0.02943200 |
| H  | -5.85062900 | -1.12941100 | 1.68056300  |
| C  | -3.99534300 | -1.89831600 | 0.99588800  |
| N  | -5.06423500 | -1.05483600 | 1.05194500  |
| H  | -3.89398300 | -2.76217700 | 1.63747900  |
| O  | -0.72653400 | 1.68125300  | 1.02848300  |
| H  | -0.03756400 | 0.98699200  | 0.92140000  |
| Cu | 2.70044200  | 0.16148500  | 1.46947900  |
| Cu | 1.32247400  | -0.27291400 | -0.40864800 |
| Cu | 3.65273800  | -0.45097800 | -0.78297600 |

$His^{(o)}-Cu_3(t)$

$E_{total} = -1137.309395$  a.u.

Electronic and zero-point Energy = -1137.146053

Thermal Energies = -1137.12913

Enthalpy = -1137.128185

Free Energy = -1137.198773

0 2

|    |             |             |             |
|----|-------------|-------------|-------------|
| N  | 4.51666500  | 0.47202800  | -0.27774000 |
| C  | 3.42432800  | -0.32629500 | 0.26954200  |
| H  | 5.36447200  | 0.33214400  | 0.26663500  |
| H  | 3.33190400  | -0.10687600 | 1.33890300  |
| C  | 2.08396900  | 0.02777700  | -0.41604400 |
| C  | 1.60088700  | 1.42164600  | -0.13910200 |
| H  | 1.30629300  | -0.67008100 | -0.08671300 |
| H  | 2.19842300  | -0.12420100 | -1.49862300 |
| C  | 2.29120600  | 2.60506000  | -0.03392700 |
| N  | 0.24612200  | 1.68149600  | 0.03373100  |
| H  | 3.34581600  | 2.81018300  | -0.11368800 |
| H  | 1.51813900  | 4.56414300  | 0.34014300  |
| C  | 0.12291800  | 2.98490500  | 0.23816400  |
| N  | 1.33988600  | 3.57946800  | 0.20704400  |
| H  | -0.80430600 | 3.51118100  | 0.40878500  |
| H  | 4.73216900  | 0.15130700  | -1.22057000 |
| C  | 3.65683800  | -1.83540500 | 0.12551800  |
| O  | 4.40239600  | -2.34783400 | -0.68362900 |
| O  | 2.91332100  | -2.54720400 | 1.00035400  |
| H  | 3.05931600  | -3.49203900 | 0.82039400  |
| Cu | -3.64720000 | 0.15394200  | -0.03203200 |
| Cu | -1.27781600 | 0.39299300  | -0.01198800 |
| Cu | -2.12248600 | -1.83012500 | -0.05236700 |



$His^{(o)}-Cu_3(\mathbf{u})$

$E_{\text{total}} = -1137.30882$  a.u.

Electronic and zero-point Energy = -1137.144919

Thermal Energies = -1137.128178

Enthalpy = -1137.127234

Free Energy = -1137.196329

0 2

|    |             |             |             |
|----|-------------|-------------|-------------|
| N  | -1.43416200 | -1.27445000 | 0.25950700  |
| C  | -2.55071700 | -0.31096700 | 0.30488800  |
| H  | -1.43129600 | -1.83000700 | 1.11437600  |
| H  | -2.52000400 | 0.21620900  | 1.26342400  |
| C  | -2.41894700 | 0.75175800  | -0.81802800 |
| C  | -1.25729000 | 1.66803200  | -0.58598600 |
| H  | -3.34357500 | 1.33729500  | -0.84161200 |
| H  | -2.32134900 | 0.24484000  | -1.78531000 |
| C  | -0.08986900 | 1.79871300  | -1.31082000 |
| N  | -1.25539700 | 2.54682200  | 0.47996000  |
| H  | 0.26642700  | 1.31847400  | -2.20904500 |
| H  | 1.56537500  | 3.07764000  | -0.89567400 |
| C  | -0.11373900 | 3.19822000  | 0.40152600  |
| N  | 0.62087200  | 2.79643200  | -0.67619400 |
| H  | 0.22844000  | 3.95943000  | 1.08842600  |
| H  | -1.61288400 | -1.94508300 | -0.48998000 |
| C  | -3.88616200 | -1.03988100 | 0.18711300  |
| O  | -4.01602300 | -2.17804700 | -0.21696900 |
| O  | -4.92423800 | -0.26604600 | 0.56369900  |
| H  | -5.74040300 | -0.77978400 | 0.43509600  |
| Cu | 2.51695000  | -0.10507200 | 1.28762900  |
| Cu | 0.51240000  | -0.58762800 | 0.08025300  |
| Cu | 2.58487500  | -1.06327100 | -1.02197100 |

$His^{(o)}-Cu_3(v)$

$E_{total} = -1137.303635$  a.u.

Electronic and zero-point Energy = -1137.139773

Thermal Energies = -1137.123158

Enthalpy = -1137.122214

Free Energy = -1137.191338

0 2

|    |             |             |             |
|----|-------------|-------------|-------------|
| N  | 0.19714300  | 2.04344800  | -0.03939600 |
| C  | 1.40968200  | 1.23096400  | 0.22557900  |
| H  | 0.08014200  | 2.73519500  | 0.70146300  |
| H  | 1.23894500  | 0.66443900  | 1.14434000  |
| C  | 1.63478500  | 0.24132300  | -0.95678700 |
| C  | 2.49385300  | -0.93655800 | -0.63840800 |
| H  | 2.06272200  | 0.78574900  | -1.80612400 |
| H  | 0.63615600  | -0.09975000 | -1.26240200 |
| C  | 3.78794500  | -1.27282700 | -0.97094000 |
| H  | 4.48428500  | -0.70411100 | -1.57289400 |
| C  | 3.06597200  | -2.89635400 | 0.22476800  |
| N  | 4.13571800  | -2.49030800 | -0.42954000 |
| H  | 2.97272000  | -3.82435300 | 0.77171000  |
| H  | 0.34518100  | 2.59178900  | -0.88844800 |
| C  | 2.62654800  | 2.13178000  | 0.40782600  |
| O  | 2.76534100  | 3.20260700  | -0.15025800 |
| O  | 3.53480300  | 1.60007400  | 1.24330000  |
| H  | 4.30764400  | 2.19143900  | 1.26882700  |
| N  | 2.04424600  | -1.99341500 | 0.13510800  |
| H  | 1.10202400  | -2.09889400 | 0.50322600  |
| Cu | -1.82916200 | -1.39257600 | 0.64439000  |
| Cu | -1.50153100 | 0.89568200  | -0.10384100 |
| Cu | -3.64804700 | -0.00555300 | -0.36880600 |

$His^{(o)}-Cu_3(w)$

$E_{total} = -1137.30882$  a.u.

Electronic and zero-point Energy = -1137.144918

Thermal Energies = -1137.128178

Enthalpy = -1137.127234

Free Energy = -1137.196333

0 2

|    |             |             |             |
|----|-------------|-------------|-------------|
| N  | -1.43418200 | -1.27436400 | 0.25870600  |
| C  | -2.55077700 | -0.31095000 | 0.30473100  |
| H  | -1.43102600 | -1.83023300 | 1.11336800  |
| H  | -2.51987200 | 0.21581800  | 1.26349100  |
| C  | -2.41915100 | 0.75231100  | -0.81773000 |
| C  | -1.25727200 | 1.66823600  | -0.58544500 |
| H  | -3.34372600 | 1.33793700  | -0.84084100 |
| H  | -2.32175900 | 0.24582500  | -1.78525700 |
| C  | -0.09006900 | 1.79895200  | -1.31067700 |
| N  | -1.25471900 | 2.54635500  | 0.48098800  |
| H  | 0.26576200  | 1.31910100  | -2.20929500 |
| H  | 1.56547600  | 3.07765300  | -0.89567500 |
| C  | -0.11292100 | 3.19753900  | 0.40245200  |
| N  | 0.62124500  | 2.79600100  | -0.67561800 |
| H  | 0.22976600  | 3.95816600  | 1.08974200  |
| H  | -1.61303300 | -1.94473800 | -0.49097300 |
| C  | -3.88623100 | -1.03984500 | 0.18699000  |
| O  | -4.01614100 | -2.17805400 | -0.21694100 |
| O  | -4.92431100 | -0.26595200 | 0.56350600  |
| H  | -5.74047500 | -0.77974200 | 0.43508900  |
| Cu | 2.58528900  | -1.06241400 | -1.02166000 |
| Cu | 0.51225200  | -0.58726500 | 0.07932700  |
| Cu | 2.51641100  | -0.10622200 | 1.28776000  |

$His^{(o)}-Cu_3(x)$

$E_{total} = -1137.309753$  a.u.

Electronic and zero-point Energy = -1137.145271

Thermal Energies = -1137.12885

Enthalpy = -1137.127905

Free Energy = -1137.196842

0 2

|    |             |             |             |
|----|-------------|-------------|-------------|
| N  | 0.75284700  | 0.25229300  | -1.09086300 |
| C  | 1.47990300  | 1.09601500  | -0.11620500 |
| H  | 0.71880600  | 0.74777700  | -1.98374200 |
| H  | 1.20162200  | 0.78608100  | 0.89508800  |
| C  | 3.02697000  | 1.01126100  | -0.25809800 |
| C  | 3.55344100  | -0.36157600 | 0.03637100  |
| H  | 3.48391100  | 1.73163400  | 0.42773900  |
| H  | 3.29981500  | 1.30934400  | -1.27898800 |
| C  | 4.44475900  | -0.75909400 | 1.00618300  |
| N  | 3.14042300  | -1.46107200 | -0.69711200 |
| H  | 4.97983300  | -0.21176500 | 1.76710400  |
| H  | 5.15689900  | -2.73657800 | 1.40427000  |
| C  | 3.76656100  | -2.49994400 | -0.18221000 |
| N  | 4.57349800  | -2.12595000 | 0.85118800  |
| H  | 3.67426400  | -3.52460500 | -0.51364000 |
| H  | 1.28641000  | -0.61096000 | -1.23620300 |
| C  | 1.03612700  | 2.53777800  | -0.31268000 |
| O  | 0.61138500  | 2.98826800  | -1.35623600 |
| O  | 1.22240700  | 3.27980500  | 0.79720300  |
| H  | 0.93791500  | 4.18816500  | 0.59648300  |
| Cu | -2.52243800 | 0.17456400  | 1.41514200  |
| Cu | -1.15214000 | -0.20285600 | -0.52267800 |
| Cu | -3.30900000 | -1.16575000 | -0.55068800 |

$His^{(-)}-Cu_3(q')$

$E_{total} = -1136.790228$  a.u.

Electronic and zero-point Energy = -1136.640069

Thermal Energies = -1136.623465

Enthalpy = -1136.622521

Free Energy = -1136.691687

-1 2

|    |             |             |             |
|----|-------------|-------------|-------------|
| N  | -3.70953600 | -2.07598900 | 0.85608400  |
| C  | -2.77249400 | -1.87664800 | -0.25691400 |
| C  | -1.30490000 | -1.65522200 | 0.20810000  |
| O  | -0.48795400 | -1.33341600 | -0.73986700 |
| H  | -4.11067000 | -1.17671100 | 1.11819200  |
| H  | -3.15332200 | -2.37206100 | 1.65825500  |
| H  | -2.75111400 | -2.79681200 | -0.86158200 |
| C  | -3.24937600 | -0.74205000 | -1.19623200 |
| C  | -3.16040200 | 0.62963800  | -0.58881800 |
| H  | -4.29155600 | -0.93763000 | -1.47423100 |
| H  | -2.63778600 | -0.78093000 | -2.10106700 |
| C  | -2.04931100 | 1.43937000  | -0.49278700 |
| N  | -4.23800800 | 1.24021300  | 0.03714900  |
| H  | -1.02625900 | 1.29649900  | -0.80456700 |
| H  | -1.86379900 | 3.32214300  | 0.48174200  |
| C  | -3.78263000 | 2.38814500  | 0.50200900  |
| N  | -2.46062200 | 2.55755200  | 0.20169400  |
| H  | -4.35666900 | 3.12450900  | 1.04800200  |
| O  | -1.01213600 | -1.81576700 | 1.40399000  |
| Cu | 2.23173200  | 1.55843600  | 0.14429800  |
| Cu | 3.64022800  | -0.46560200 | 0.01524100  |
| Cu | 1.26472000  | -0.66653700 | -0.19727600 |

$His^{(-)}-Cu_3(r')$

$E_{total} = -1136.783256$  a.u.

Electronic and zero-point Energy = -1136.633103

Thermal Energies = -1136.616725

Enthalpy = -1136.61578

Free Energy = -1136.686071

-1 2

|    |             |             |             |
|----|-------------|-------------|-------------|
| N  | -2.96702100 | 2.24481000  | 1.11236900  |
| C  | -1.75569000 | 1.50283300  | 0.73481000  |
| C  | -1.43117100 | 1.60802500  | -0.78736900 |
| O  | -0.39951100 | 0.95234900  | -1.21137500 |
| H  | -3.75643900 | 1.60269700  | 1.15284600  |
| H  | -3.17132700 | 2.88005700  | 0.34069800  |
| H  | -0.89343200 | 1.95244800  | 1.25150900  |
| C  | -1.83542400 | 0.03569100  | 1.22110200  |
| C  | -2.83700200 | -0.80884500 | 0.48627000  |
| H  | -2.10424400 | 0.04102000  | 2.28346700  |
| H  | -0.83910700 | -0.40946600 | 1.14214000  |
| C  | -2.73610600 | -1.32163100 | -0.78913400 |
| N  | -4.06250800 | -1.15961100 | 1.03358700  |
| H  | -1.96069500 | -1.22549100 | -1.53362300 |
| H  | -4.18364600 | -2.45888000 | -1.87204300 |
| C  | -4.68712000 | -1.86092700 | 0.10850400  |
| N  | -3.92274500 | -1.99069600 | -1.01779300 |
| H  | -5.67305900 | -2.29675100 | 0.19767500  |
| O  | -2.15991800 | 2.30725000  | -1.50597600 |
| Cu | 2.61730000  | -0.23253300 | 1.46112700  |
| Cu | 1.23595800  | 0.30965300  | -0.43023100 |
| Cu | 3.43703100  | -0.58590700 | -0.85731300 |

$His^{(-)}-Cu_3(s')$

$E_{total} = -1136.787336$  a.u.

Electronic and zero-point Energy = -1136.636707

Thermal Energies = -1136.620504

Enthalpy = -1136.619559

Free Energy = -1136.687681

-1 2

|    |             |             |             |
|----|-------------|-------------|-------------|
| N  | 0.60854900  | -0.18410700 | -1.03516200 |
| C  | 1.43882000  | -1.31293900 | -0.56706700 |
| C  | 1.30164100  | -1.50101300 | 0.98784400  |
| O  | 2.24270300  | -2.08117900 | 1.56787200  |
| H  | 0.40515100  | -0.25918800 | -2.02815500 |
| H  | 1.10206200  | 0.69678100  | -0.89835200 |
| H  | 0.99655400  | -2.21990900 | -1.00161100 |
| C  | 2.91264100  | -1.23908000 | -1.02694600 |
| C  | 3.63721100  | -0.01033300 | -0.55266200 |
| H  | 2.95708000  | -1.25180600 | -2.12264500 |
| H  | 3.41441700  | -2.13525300 | -0.65059800 |
| C  | 3.99166300  | 0.32198200  | 0.73754700  |
| N  | 4.02454000  | 1.00186600  | -1.41995600 |
| H  | 3.82872600  | -0.20447900 | 1.66575700  |
| H  | 4.96268400  | 2.09794900  | 1.41984000  |
| C  | 4.60043800  | 1.92119600  | -0.67049700 |
| N  | 4.60842700  | 1.55508400  | 0.64708400  |
| H  | 5.02226600  | 2.85384200  | -1.01991300 |
| O  | 0.21969400  | -1.08128400 | 1.51297800  |
| Cu | -3.24965200 | -0.49202700 | -0.94865100 |
| Cu | -1.15272800 | -0.17650000 | 0.26717000  |
| Cu | -2.98979900 | 1.35931900  | 0.65375000  |

$His^{(-)}-Cu_3(t')$

$E_{total} = -1136.769003$  a.u.

Electronic and zero-point Energy = -1136.619135

Thermal Energies = -1136.602503

Enthalpy = -1136.601559

Free Energy = -1136.670847

-1 2

|    |             |             |             |
|----|-------------|-------------|-------------|
| N  | 4.64362900  | 0.70588100  | -0.28341900 |
| C  | 3.70000900  | -0.23877000 | 0.36203900  |
| H  | 5.43273900  | 0.82020300  | 0.35172100  |
| H  | 3.61580500  | 0.01508400  | 1.42551000  |
| C  | 2.29635200  | -0.12606900 | -0.26988000 |
| C  | 1.64336400  | 1.21861500  | -0.13470400 |
| H  | 1.65355100  | -0.88359800 | 0.19052200  |
| H  | 2.37555900  | -0.38688800 | -1.33534200 |
| C  | 2.21511800  | 2.46911500  | -0.13710200 |
| N  | 0.26478900  | 1.37490700  | 0.00740700  |
| H  | 3.25285400  | 2.74090300  | -0.24132300 |
| H  | 1.26303700  | 4.37741300  | 0.05645600  |
| C  | 0.01804600  | 2.67631400  | 0.09325600  |
| N  | 1.17613200  | 3.37395800  | 0.00968600  |
| H  | -0.95634900 | 3.12567000  | 0.21591600  |
| H  | 5.04377600  | 0.15303400  | -1.05014000 |
| C  | 4.17155400  | -1.73903700 | 0.25203800  |
| O  | 5.00286300  | -1.97130500 | -0.67049700 |
| O  | 3.64541300  | -2.52884500 | 1.07401700  |
| Cu | -1.22239000 | 0.05909000  | -0.01210400 |
| Cu | -3.62339900 | 0.44388600  | 0.20039900  |
| Cu | -2.66199300 | -1.80314300 | -0.25626400 |



$His^{(-)}-Cu_3(\mathbf{u}')$

$E_{\text{total}} = -1136.783263$  a.u.

Electronic and zero-point Energy = -1136.632612

Thermal Energies = -1136.616341

Enthalpy = -1136.615396

Free Energy = -1136.682668

-1 2

|    |             |             |             |
|----|-------------|-------------|-------------|
| N  | 1.49589900  | -1.15188500 | -0.50878700 |
| C  | 2.65800800  | -0.21360800 | -0.43274300 |
| H  | 1.46237900  | -1.51279200 | -1.46163800 |
| H  | 2.75196500  | 0.31343500  | -1.38634600 |
| C  | 2.47710200  | 0.83292300  | 0.68701700  |
| C  | 1.27943100  | 1.71547500  | 0.52159200  |
| H  | 3.39140900  | 1.43406100  | 0.70044300  |
| H  | 2.41257500  | 0.31183400  | 1.65067000  |
| C  | 0.10577900  | 1.69968200  | 1.25210500  |
| N  | 1.19355300  | 2.67792400  | -0.47159600 |
| H  | -0.19312300 | 1.13939800  | 2.12466400  |
| H  | -1.66802400 | 2.83676500  | 0.91174100  |
| C  | 0.00386800  | 3.22643100  | -0.34068100 |
| N  | -0.69068300 | 2.69234400  | 0.70646300  |
| H  | -0.40421200 | 4.00722800  | -0.96816900 |
| H  | 1.84360300  | -1.95946000 | 0.03751700  |
| C  | 3.97200300  | -1.03928200 | -0.15300700 |
| O  | 3.77229000  | -2.22279600 | 0.24886300  |
| O  | 5.04392300  | -0.42055900 | -0.32884600 |
| Cu | -2.50149300 | -1.06938200 | 1.04576900  |
| Cu | -0.40662900 | -0.60353200 | -0.09659000 |
| Cu | -2.50893900 | -0.12991500 | -1.23391300 |

$His^{(-)}-Cu_3(v')$

$E_{total} = -1136.789282$  a.u.

Electronic and zero-point Energy = -1136.638919

Thermal Energies = -1136.622848

Enthalpy = -1136.621903

Free Energy = -1136.69183

-1 2

|    |             |             |             |
|----|-------------|-------------|-------------|
| N  | 0.78234800  | 1.23029100  | 1.10112500  |
| C  | 2.05594900  | 1.34337600  | 0.32191700  |
| H  | 0.95945700  | 0.81044000  | 2.01144300  |
| H  | 2.89926600  | 1.23465200  | 1.01750700  |
| C  | 2.22261200  | 0.29243600  | -0.78663300 |
| C  | 2.53267800  | -1.09813100 | -0.31778100 |
| H  | 3.04420200  | 0.65081100  | -1.41337100 |
| H  | 1.32293900  | 0.29230600  | -1.41753800 |
| C  | 3.72916300  | -1.75868300 | -0.11696300 |
| H  | 4.72559200  | -1.37639500 | -0.29439000 |
| C  | 2.21266100  | -3.16197600 | 0.44709000  |
| N  | 3.52370900  | -3.03878000 | 0.35992900  |
| H  | 1.67769000  | -4.04270500 | 0.77537200  |
| H  | 0.56615100  | 2.24001200  | 1.24319700  |
| C  | 2.14605300  | 2.82866400  | -0.22169900 |
| O  | 1.34222400  | 3.62904000  | 0.33922400  |
| O  | 3.01708600  | 3.04012500  | -1.08989700 |
| N  | 1.57165400  | -2.02051800 | 0.05603000  |
| H  | 0.56244500  | -1.88384800 | -0.00241200 |
| Cu | -2.07409600 | -1.53853400 | -0.40261600 |
| Cu | -3.27355000 | 0.58765900  | -0.04004600 |
| Cu | -0.89962500 | 0.42847200  | 0.35681400  |

$His^{(-)}-Cu_3(w')$

$E_{total} = -1136.783263 \text{ a.u.}$

Electronic and zero-point Energy = -1136.632612

Thermal Energies = -1136.61634

Enthalpy = -1136.615396

Free Energy = -1136.682669

-1 2

|    |             |             |             |
|----|-------------|-------------|-------------|
| N  | 1.49579300  | -1.15219000 | -0.50810100 |
| C  | 2.65795100  | -0.21386000 | -0.43258400 |
| H  | 1.46258600  | -1.51380400 | -1.46068300 |
| H  | 2.75140800  | 0.31299600  | -1.38633500 |
| C  | 2.47710800  | 0.83286100  | 0.68701900  |
| C  | 1.27945900  | 1.71545300  | 0.52155500  |
| H  | 3.39141800  | 1.43400200  | 0.70032600  |
| H  | 2.41260300  | 0.31192800  | 1.65075900  |
| C  | 0.10579300  | 1.69979600  | 1.25206900  |
| N  | 1.19367500  | 2.67789900  | -0.47163700 |
| H  | -0.19331900 | 1.13930300  | 2.12441400  |
| H  | -1.66775500 | 2.83746700  | 0.91205600  |
| C  | 0.00403200  | 3.22651900  | -0.34075200 |
| N  | -0.69061200 | 2.69240900  | 0.70631700  |
| H  | -0.40399200 | 4.00734700  | -0.96823900 |
| H  | 1.84306800  | -1.95931000 | 0.03893600  |
| C  | 3.97209300  | -1.03932100 | -0.15303600 |
| O  | 3.77259900  | -2.22243700 | 0.25002400  |
| O  | 5.04391500  | -0.42071600 | -0.33024700 |
| Cu | -2.50126500 | -1.06909000 | 1.04591000  |
| Cu | -0.40674400 | -0.60331500 | -0.09688300 |
| Cu | -2.50918900 | -0.13036200 | -1.23389400 |

$His^{(-)}-Cu_3(x')$

$E_{total} = -1136.782884$  a.u.

Electronic and zero-point Energy = -1136.632248

Thermal Energies = -1136.615959

Enthalpy = -1136.615014

Free Energy = -1136.683526

-1 2

|    |             |             |             |
|----|-------------|-------------|-------------|
| N  | -1.29280700 | -1.04834200 | -0.70176600 |
| C  | -2.34270800 | -0.61838600 | 0.27704700  |
| H  | -1.55408100 | -2.03758100 | -0.86358700 |
| H  | -1.87640900 | -0.54124500 | 1.26623600  |
| C  | -2.93631800 | 0.75434200  | -0.08762100 |
| C  | -1.90364300 | 1.83389100  | -0.22994300 |
| H  | -3.67007800 | 0.99598300  | 0.68557300  |
| H  | -3.48371700 | 0.67106200  | -1.03484700 |
| C  | -1.26497500 | 2.55725600  | 0.75354300  |
| N  | -1.37975400 | 2.17548700  | -1.46789700 |
| H  | -1.36017000 | 2.55398100  | 1.82839200  |
| H  | 0.37191300  | 3.91218400  | 0.53940800  |
| C  | -0.44404300 | 3.07374200  | -1.23271400 |
| N  | -0.34396000 | 3.35372300  | 0.09913100  |
| H  | 0.17930800  | 3.55084400  | -1.97637100 |
| H  | -1.45929500 | -0.57260700 | -1.59004700 |
| C  | -3.45501600 | -1.72923200 | 0.38374600  |
| O  | -3.22211200 | -2.77768600 | -0.28357600 |
| O  | -4.41905300 | -1.44838300 | 1.13043600  |
| Cu | 2.24654700  | 0.57711300  | 1.02683600  |
| Cu | 2.96170800  | -1.25221300 | -0.46616700 |
| Cu | 0.62546000  | -0.74972100 | -0.22688500 |
